# Supplementary material for: Global Research Trends in Tendon Stem Cells from 1991 to 2020: A Bibliometric and Visualized Study
Source: Hindawi journal article supplement (doi:10.1155/2022/7937765), 2022-06-18
Supplement: f1 [file 7937765.f1.pdf]

Supplementary Table 1. Countries/Regions and number of papers published on tendon stem cells from 1991 to 2020.

| Countries/Regions | Number of papers |
|-------------------|------------------|
| USA               | 938              |
| PEOPLES R CHINA   | 567              |
| ENGLAND           | 219              |
| GERMANY           | 195              |
| ITALY             | 173              |
| JAPAN             | 163              |
| SOUTH KOREA       | 91               |
| SWITZERLAND       | 82               |
| AUSTRALIA         | 59               |
| FRANCE            | 56               |
| SINGAPORE         | 53               |
| SPAIN             | 52               |
| CANADA            | 50               |
| PORTUGAL          | 46               |
| BRAZIL            | 43               |
| NETHERLANDS       | 37               |
| TAIWAN            | 34               |
| AUSTRIA           | 32               |
| IRAN              | 26               |
| TURKEY            | 26               |
| IRELAND           | 25               |
| SWEDEN            | 25               |
| POLAND            | 24               |
| INDIA             | 22               |
| SCOTLAND          | 22               |
| ISRAEL            | 21               |
| BELGIUM           | 14               |
| DENMARK           | 12               |
| MALAYSIA          | 12               |
| BULGARIA          | 10               |
| GREECE            | 8                |
| CHILE             | 6                |
| NORWAY            | 5                |
| INDONESIA         | 4                |
| MEXICO            | 4                |
| SAUDI ARABIA      | 4                |
| COLOMBIA          | 3                |
| FINLAND           | 3                |
| IRAQ              | 3                |
| NEW ZEALAND       | 3                |
| NORTH IRELAND     | 3                |

|                 |   |
|-----------------|---|
| RUSSIA          | 3 |
| WALES           | 3 |
| CZECH REPUBLIC  | 2 |
| EGYPT           | 2 |
| HUNGARY         | 2 |
| SERBIA          | 2 |
| ARGENTINA       | 1 |
| CROATIA         | 1 |
| CYPRUS          | 1 |
| ETHIOPIA        | 1 |
| GRENADA         | 1 |
| JORDAN          | 1 |
| LEBANON         | 1 |
| LITHUANIA       | 1 |
| NIGERIA         | 1 |
| PAKISTAN        | 1 |
| PALESTINE       | 1 |
| ROMANIA         | 1 |
| SLOVAKIA        | 1 |
| SLOVENIA        | 1 |
| SOUTH AFRICA    | 1 |
| THAILAND        | 1 |
| TRINIDAD TOBAGO | 1 |
| URUGUAY         | 1 |

---
