# Supplementary material for: Global Research Trends in Tendon Stem Cells from 1991 to 2020: A Bibliometric and Visualized Study
Source: Hindawi journal article supplement (doi:10.1155/2022/7937765), 2022-06-18
Supplement: f2 [file 7937765.f2.pdf]

Supplementary Table 2. Journals and number of papers published on tendon stem cells from 1991 to 2020.

| Journals                                                                 | Number of papers |
|--------------------------------------------------------------------------|------------------|
| JOURNAL OF ORTHOPAEDIC RESEARCH                                          | 100              |
| AMERICAN JOURNAL OF SPORTS MEDICINE                                      | 83               |
| TISSUE ENGINEERING PART A                                                | 77               |
| BIOMATERIALS                                                             | 63               |
| ACTA BIOMATERIALIA                                                       | 51               |
| PLOS ONE                                                                 | 49               |
| STEM CELLS INTERNATIONAL                                                 | 49               |
| STEM CELL RESEARCH THERAPY                                               | 46               |
| JOURNAL OF TISSUE ENGINEERING AND REGENERATIVE MEDICINE                  | 38               |
| ARTHROSCOPY THE JOURNAL OF ARTHROSCOPIC AND RELATED SURGERY              | 37               |
| KNEE SURGERY SPORTS TRAUMATOLOGY ARTHROSCOPY                             | 36               |
| SCIENTIFIC REPORTS                                                       | 33               |
| CURRENT STEM CELL RESEARCH THERAPY                                       | 30               |
| INTERNATIONAL JOURNAL OF MOLECULAR SCIENCES                              | 30               |
| CONNECTIVE TISSUE RESEARCH                                               | 28               |
| CELL TRANSPLANTATION                                                     | 27               |
| JOURNAL OF SHOULDER AND ELBOW SURGERY                                    | 27               |
| JOURNAL OF BIOMEDICAL MATERIALS RESEARCH PART A                          | 26               |
| TISSUE ENGINEERING                                                       | 24               |
| STEM CELLS AND DEVELOPMENT                                               | 23               |
| EQUINE VETERINARY JOURNAL                                                | 20               |
| BIOCHEMICAL AND BIOPHYSICAL RESEARCH COMMUNICATIONS                      | 19               |
| JOURNAL OF BONE AND JOINT SURGERY AMERICAN VOLUME                        | 19               |
| TISSUE ENGINEERING PART B REVIEWS                                        | 19               |
| CLINICAL ORTHOPAEDICS AND RELATED RESEARCH                               | 18               |
| PLASTIC AND RECONSTRUCTIVE SURGERY                                       | 18               |
| JOURNAL OF HAND SURGERY AMERICAN VOLUME                                  | 17               |
| BMC MUSCULOSKELETAL DISORDERS                                            | 16               |
| JOURNAL OF CELLULAR PHYSIOLOGY                                           | 16               |
| REGENERATIVE MEDICINE                                                    | 16               |
| INTERNATIONAL ORTHOPAEDICS                                               | 15               |
| JOURNAL OF ORTHOPAEDIC SURGERY AND RESEARCH                              | 15               |
| STEM CELLS                                                               | 15               |
| TISSUE ENGINEERING PART C METHODS                                        | 15               |
| ADVANCES IN EXPERIMENTAL MEDICINE AND BIOLOGY                            | 14               |
| CELLS                                                                    | 14               |
| JOURNAL OF BIOMEDICAL MATERIALS RESEARCH PART B APPLIED POLYMER SYMPOSIA | 14               |
| ADVANCED HEALTHCARE MATERIALS                                            | 13               |
| BIOMED RESEARCH INTERNATIONAL                                            | 13               |
| BIOMEDICAL MATERIALS                                                     | 13               |
| CELLULAR PHYSIOLOGY AND BIOCHEMISTRY                                     | 13               |
| CYTOTHERAPY                                                              | 13               |

|                                                      |    |
|------------------------------------------------------|----|
| TISSUE ENGINEERING AND REGENERATIVE MEDICINE         | 13 |
| BONE JOINT RESEARCH                                  | 12 |
| FRONTIERS IN VETERINARY SCIENCE                      | 12 |
| STEM CELLS TRANSLATIONAL MEDICINE                    | 12 |
| CELL AND TISSUE RESEARCH                             | 11 |
| EUROPEAN CELLS MATERIALS                             | 11 |
| JOURNAL OF CELLULAR AND MOLECULAR MEDICINE           | 11 |
| JOURNAL OF EQUINE VETERINARY SCIENCE                 | 11 |
| JOURNAL OF THE MECHANICAL BEHAVIOR OF BIOMEDICAL M/  | 11 |
| MATERIALS SCIENCE ENGINEERING C MATERIALS FOR BIOLOG | 11 |
| STEM CELL REVIEWS AND REPORTS                        | 11 |
| ANNALS OF BIOMEDICAL ENGINEERING                     | 10 |
| ANNALS OF THE NEW YORK ACADEMY OF SCIENCES           | 10 |
| JOURNAL OF BIOMECHANICS                              | 10 |
| JOURNAL OF MATERIALS CHEMISTRY B                     | 10 |
| JOURNAL OF THE AMERICAN ACADEMY OF ORTHOPAEDIC SUR   | 10 |
| ACS BIOMATERIALS SCIENCE ENGINEERING                 | 9  |
| AMERICAN JOURNAL OF VETERINARY RESEARCH              | 9  |
| EXPERT OPINION ON BIOLOGICAL THERAPY                 | 9  |
| OPERATIVE TECHNIQUES IN SPORTS MEDICINE              | 9  |
| DEVELOPMENT                                          | 8  |
| FASEB JOURNAL                                        | 8  |
| FRONTIERS IN BIOENGINEERING AND BIOTECHNOLOGY        | 8  |
| JOURNAL OF BONE AND MINERAL RESEARCH                 | 8  |
| JOURNAL OF MATERIALS SCIENCE MATERIALS IN MEDICINE   | 8  |
| JOURNAL OF ORTHOPAEDIC TRANSLATION                   | 8  |
| MATERIALS                                            | 8  |
| MOLECULAR MEDICINE REPORTS                           | 8  |
| RESEARCH IN VETERINARY SCIENCE                       | 8  |
| ACS APPLIED MATERIALS INTERFACES                     | 7  |
| ADVANCED DRUG DELIVERY REVIEWS                       | 7  |
| BIOFABRICATION                                       | 7  |
| BIOMATERIALS SCIENCE                                 | 7  |
| BONE                                                 | 7  |
| CLINICS IN SPORTS MEDICINE                           | 7  |
| EUROPEAN REVIEW FOR MEDICAL AND PHARMACOLOGICAL S    | 7  |
| HISTOLOGY AND HISTOPATHOLOGY                         | 7  |
| INTERNATIONAL JOURNAL OF NANOMEDICINE                | 7  |
| JOURNAL OF BIOMATERIALS SCIENCE POLYMER EDITION      | 7  |
| JOURNAL OF CELLULAR BIOCHEMISTRY                     | 7  |
| JOURNAL OF TISSUE ENGINEERING                        | 7  |
| JOVE JOURNAL OF VISUALIZED EXPERIMENTS               | 7  |
| MEDICAL SCIENCE MONITOR                              | 7  |
| SPORTS MEDICINE AND ARTHROSCOPY REVIEW               | 7  |
| VETERINARY CLINICS OF NORTH AMERICA EQUINE PRACTICE  | 7  |

|                                                       |   |
|-------------------------------------------------------|---|
| VETERINARY JOURNAL                                    | 7 |
| BRITISH MEDICAL BULLETIN                              | 6 |
| CELLS TISSUES ORGANS                                  | 6 |
| DEVELOPMENTAL BIOLOGY                                 | 6 |
| EXPERIMENTAL CELL RESEARCH                            | 6 |
| FRONTIERS IN CELL AND DEVELOPMENTAL BIOLOGY           | 6 |
| JOURNAL OF BIOMATERIALS AND TISSUE ENGINEERING        | 6 |
| JOURNAL OF BIOMECHANICAL ENGINEERING TRANSACTIONS (   | 6 |
| MATRIX BIOLOGY                                        | 6 |
| PM R                                                  | 6 |
| PROCEEDINGS OF THE NATIONAL ACADEMY OF SCIENCES OF T  | 6 |
| VETERINARY AND COMPARATIVE ORTHOPAEDICS AND TRAUM     | 6 |
| VETERINARY RESEARCH COMMUNICATIONS                    | 6 |
| VETERINARY SURGERY                                    | 6 |
| BIOTECHNOLOGY AND BIOENGINEERING                      | 5 |
| BMC CELL BIOLOGY                                      | 5 |
| CELL BIOLOGY INTERNATIONAL                            | 5 |
| CELL PROLIFERATION                                    | 5 |
| CHINESE MEDICAL JOURNAL                               | 5 |
| CYTOTECHNOLOGY                                        | 5 |
| FRONTIERS IN BIOSCIENCE LANDMARK                      | 5 |
| JOURNAL OF ANATOMY                                    | 5 |
| JOURNAL OF APPLIED PHYSIOLOGY                         | 5 |
| JOURNAL OF CLINICAL INVESTIGATION                     | 5 |
| METABOLIC INFLUENCES ON RISK FOR TENDON DISORDERS     | 5 |
| ONCOTARGET                                            | 5 |
| ORTHOPAEDIC JOURNAL OF SPORTS MEDICINE                | 5 |
| ADVANCED FUNCTIONAL MATERIALS                         | 4 |
| AMERICAN JOURNAL OF PHYSIOLOGY CELL PHYSIOLOGY        | 4 |
| ANNUAL REVIEW OF BIOMEDICAL ENGINEERING               | 4 |
| ARCHIVOS DE MEDICINA VETERINARIA                      | 4 |
| BIOLOGY OPEN                                          | 4 |
| BIOTECHNOLOGY LETTERS                                 | 4 |
| BIRTH DEFECTS RESEARCH PART C EMBRYO TODAY REVIEWS    | 4 |
| BMC VETERINARY RESEARCH                               | 4 |
| BONE RESEARCH                                         | 4 |
| CURRENT GENE THERAPY                                  | 4 |
| CURRENT PHARMACEUTICAL DESIGN                         | 4 |
| CYTOMETRY PART A                                      | 4 |
| DIFFERENTIATION                                       | 4 |
| EXPERIMENTAL AND THERAPEUTIC MEDICINE                 | 4 |
| FRONTIERS IN PHYSIOLOGY                               | 4 |
| IN VITRO CELLULAR DEVELOPMENTAL BIOLOGY ANIMAL        | 4 |
| INJURY INTERNATIONAL JOURNAL OF THE CARE OF THE INJUR | 4 |
| INTERNATIONAL JOURNAL OF CLINICAL AND EXPERIMENTAL I  | 4 |

|                                                       |   |
|-------------------------------------------------------|---|
| INTERNATIONAL JOURNAL OF MOLECULAR MEDICINE           | 4 |
| JOURNAL OF BIOLOGICAL CHEMISTRY                       | 4 |
| JOURNAL OF MUSCULOSKELETAL NEURONAL INTERACTIONS      | 4 |
| JOURNAL OF NANOMATERIALS                              | 4 |
| JOURNAL OF ORTHOPAEDIC SCIENCE                        | 4 |
| JOURNAL OF TRANSLATIONAL MEDICINE                     | 4 |
| MACROMOLECULAR BIOSCIENCE                             | 4 |
| MUSCULOSKELETAL REPAIR AND REGENERATION               | 4 |
| NATURE REVIEWS RHEUMATOLOGY                           | 4 |
| PFERDEHEILKUNDE                                       | 4 |
| PHYSICAL MEDICINE AND REHABILITATION CLINICS OF NORTH | 4 |
| POLYMERS                                              | 4 |
| REGENERATIVE THERAPY                                  | 4 |
| TRENDS IN BIOTECHNOLOGY                               | 4 |
| WORLD JOURNAL OF STEM CELLS                           | 4 |
| ACTA OF BIOENGINEERING AND BIOMECHANICS               | 3 |
| ADVANCED MATERIALS                                    | 3 |
| AGING CELL                                            | 3 |
| ANNALS OF PLASTIC SURGERY                             | 3 |
| ARCHIVES OF ORTHOPAEDIC AND TRAUMA SURGERY            | 3 |
| ARTHRITIS RESEARCH THERAPY                            | 3 |
| ARTIFICIAL ORGANS                                     | 3 |
| BIOACTIVE MATERIALS                                   | 3 |
| BIOTECHNOLOGY AND BIOPROCESS ENGINEERING              | 3 |
| BIOTECHNOLOGY JOURNAL                                 | 3 |
| BRITISH JOURNAL OF SPORTS MEDICINE                    | 3 |
| CALCIFIED TISSUE INTERNATIONAL                        | 3 |
| CANADIAN VETERINARY JOURNAL REVUE VETERINAIRE CANA    | 3 |
| CLINICS IN PODIATRIC MEDICINE AND SURGERY             | 3 |
| CURRENT TOPICS IN DEVELOPMENTAL BIOLOGY               | 3 |
| DEVELOPMENTAL DYNAMICS                                | 3 |
| DISABILITY AND REHABILITATION                         | 3 |
| ELIFE                                                 | 3 |
| EXPERIMENTAL NEUROLOGY                                | 3 |
| FOOT AND ANKLE CLINICS                                | 3 |
| INTERNATIONAL JOURNAL OF ARTIFICIAL ORGANS            | 3 |
| INTERNATIONAL JOURNAL OF EXPERIMENTAL PATHOLOGY       | 3 |
| INTERNATIONAL JOURNAL OF STEM CELLS                   | 3 |
| JCI INSIGHT                                           | 3 |
| JOURNAL OF BIOMATERIALS APPLICATIONS                  | 3 |
| JOURNAL OF BONE AND JOINT SURGERY BRITISH VOLUME      | 3 |
| JOURNAL OF HAND SURGERY EUROPEAN VOLUME               | 3 |
| JOURNAL OF PLASTIC RECONSTRUCTIVE AND AESTHETIC SURG  | 3 |
| LASERS IN MEDICAL SCIENCE                             | 3 |
| MEDICAL HYPOTHESES                                    | 3 |

|                                                          |   |
|----------------------------------------------------------|---|
| MOLECULAR AND CELLULAR BIOCHEMISTRY                      | 3 |
| MOLECULAR BIOLOGY REPORTS                                | 3 |
| NANOMEDICINE                                             | 3 |
| NANOMEDICINE NANOTECHNOLOGY BIOLOGY AND MEDICINE         | 3 |
| NATURE COMMUNICATIONS                                    | 3 |
| NATURE MEDICINE                                          | 3 |
| ORTHOPEDIC CLINICS OF NORTH AMERICA                      | 3 |
| PLATELETS                                                | 3 |
| POLISH JOURNAL OF VETERINARY SCIENCES                    | 3 |
| RHEUMATOLOGY                                             | 3 |
| SCANDINAVIAN JOURNAL OF MEDICINE SCIENCE IN SPORTS       | 3 |
| SCIENCE ADVANCES                                         | 3 |
| VETERINARY QUARTERLY                                     | 3 |
| WILEY INTERDISCIPLINARY REVIEWS DEVELOPMENTAL BIOLC      | 3 |
| ACTA BIOCHIMICA ET BIOPHYSICA SINICA                     | 2 |
| ACTA CIRURGICA BRASILEIRA                                | 2 |
| ACTA ORTHOPAEDICA ET TRAUMATOLOGICA TURCICA              | 2 |
| ADVANCED SCIENCE                                         | 2 |
| ADVANCED THERAPEUTICS                                    | 2 |
| ADVANCES IN BIOCHEMICAL ENGINEERING BIOTECHNOLOGY        | 2 |
| AGING US                                                 | 2 |
| AMERICAN JOURNAL OF PATHOLOGY                            | 2 |
| AMERICAN JOURNAL OF PHYSICAL MEDICINE REHABILITATION     | 2 |
| AMERICAN JOURNAL OF TRANSLATIONAL RESEARCH               | 2 |
| ANNALS OF TRANSLATIONAL MEDICINE                         | 2 |
| ARCHIVES OF MEDICAL SCIENCE                              | 2 |
| BIO MEDICAL MATERIALS AND ENGINEERING                    | 2 |
| BIOMACROMOLECULES                                        | 2 |
| BIOMECHANICS AND MODELING IN MECHANOBIOLOGY              | 2 |
| BIOMEDICAL ENGINEERING ONLINE                            | 2 |
| BIOTECHNOLOGY ADVANCES                                   | 2 |
| BONE JOINT JOURNAL                                       | 2 |
| CANADIAN JOURNAL OF VETERINARY RESEARCH REVUE CANADIENNE | 2 |
| CELL AND TISSUE BANKING                                  | 2 |
| CELL BIOCHEMISTRY AND BIOPHYSICS                         | 2 |
| CELL CYCLE                                               | 2 |
| CELL DEATH DISEASE                                       | 2 |
| CELL JOURNAL                                             | 2 |
| CLINICAL JOURNAL OF SPORT MEDICINE                       | 2 |
| CLINICS IN PLASTIC SURGERY                               | 2 |
| COLLOIDS AND SURFACES B BIOINTERFACES                    | 2 |
| CURRENT PHARMACEUTICAL BIOTECHNOLOGY                     | 2 |
| DENTAL MATERIALS                                         | 2 |
| DEVELOPMENT GROWTH DIFFERENTIATION                       | 2 |
| DISCOVERY MEDICINE                                       | 2 |

|                                                      |   |
|------------------------------------------------------|---|
| ENGINEERING MINERALIZED AND LOAD BEARING TISSUES     | 2 |
| EQUINE VETERINARY EDUCATION                          | 2 |
| EXPERIMENTAL BIOLOGY AND MEDICINE                    | 2 |
| FOLIA MORPHOLOGICA                                   | 2 |
| FRONTIERS IN AGING NEUROSCIENCE                      | 2 |
| FRONTIERS IN PHARMACOLOGY                            | 2 |
| GENE                                                 | 2 |
| GROWTH FACTORS                                       | 2 |
| IN VIVO                                              | 2 |
| INDIAN JOURNAL OF ANIMAL SCIENCES                    | 2 |
| INTERNATIONAL JOURNAL OF BIOCHEMISTRY CELL BIOLOGY   | 2 |
| INTERNATIONAL JOURNAL OF BIOLOGICAL MACROMOLECULE    | 2 |
| INTERNATIONAL JOURNAL OF MORPHOLOGY                  | 2 |
| INTERNATIONAL JOURNAL OF ORAL SCIENCE                | 2 |
| IRANIAN JOURNAL OF BASIC MEDICAL SCIENCES            | 2 |
| JOINT BONE SPINE                                     | 2 |
| JOURNAL OF APPLIED BIOMATERIALS FUNCTIONAL MATERIAL  | 2 |
| JOURNAL OF BIOMEDICAL MATERIALS RESEARCH             | 2 |
| JOURNAL OF BIOMEDICAL NANOTECHNOLOGY                 | 2 |
| JOURNAL OF BIOMEDICAL SCIENCE                        | 2 |
| JOURNAL OF BONE AND MINERAL METABOLISM               | 2 |
| JOURNAL OF CELL BIOLOGY                              | 2 |
| JOURNAL OF CELL SCIENCE                              | 2 |
| JOURNAL OF CLINICAL MEDICINE                         | 2 |
| JOURNAL OF GENE MEDICINE                             | 2 |
| JOURNAL OF MOLECULAR HISTOLOGY                       | 2 |
| JOURNAL OF NUTRITION HEALTH AGING                    | 2 |
| JOURNAL OF ORTHOPAEDIC SURGERY                       | 2 |
| JOURNAL OF PAIN RESEARCH                             | 2 |
| JOURNAL OF PEDIATRIC SURGERY                         | 2 |
| JOURNAL OF STEROID BIOCHEMISTRY AND MOLECULAR BIOLC  | 2 |
| JOURNAL OF SURGICAL RESEARCH                         | 2 |
| JOURNAL OF THE HELLENIC VETERINARY MEDICAL SOCIETY   | 2 |
| JOURNAL OF THE ROYAL SOCIETY INTERFACE               | 2 |
| KNEE                                                 | 2 |
| LABORATORY INVESTIGATION                             | 2 |
| MATERIALS SCIENCE ENGINEERING C BIOMIMETIC AND SUPRA | 2 |
| MEDICAL ENGINEERING PHYSICS                          | 2 |
| MEDICINE                                             | 2 |
| MICROSCOPY RESEARCH AND TECHNIQUE                    | 2 |
| MOLECULAR PHARMACEUTICS                              | 2 |
| MOLECULAR THERAPY                                    | 2 |
| NANOSCALE                                            | 2 |
| NEUROSCIENCE                                         | 2 |
| NPJ REGENERATIVE MEDICINE                            | 2 |

|                                                      |   |
|------------------------------------------------------|---|
| ORTHOPAEDICS TRAUMATOLOGY SURGERY RESEARCH           | 2 |
| ORTHOPEDICS                                          | 2 |
| OXIDATIVE MEDICINE AND CELLULAR LONGEVITY            | 2 |
| PEERJ                                                | 2 |
| PHARMACEUTICS                                        | 2 |
| PHYSICIAN AND SPORTSMEDICINE                         | 2 |
| PROCEEDINGS OF THE INSTITUTION OF MECHANICAL ENGINEE | 2 |
| PROTEOMICS                                           | 2 |
| PROTEOMICS CLINICAL APPLICATIONS                     | 2 |
| REJUVENATION RESEARCH                                | 2 |
| RSC ADVANCES                                         | 2 |
| SCIENTIST                                            | 2 |
| SEMINARS IN ARTHRITIS AND RHEUMATISM                 | 2 |
| SPORTS MEDICINE                                      | 2 |
| STEM CELL RESEARCH                                   | 2 |
| TECHNOLOGY AND HEALTH CARE                           | 2 |
| THERIOGENOLOGY                                       | 2 |
| TOXICOLOGY RESEARCH                                  | 2 |
| TRANSLATIONAL RESEARCH                               | 2 |
| TRANSPLANTATION                                      | 2 |
| TRANSPLANTATION PROCEEDINGS                          | 2 |
| VERTEBRATE SKELETAL DEVELOPMENT                      | 2 |
| VETERINARY MEDICINE AND SCIENCE                      | 2 |
| WOUND REPAIR AND REGENERATION                        | 2 |
| ACS CHEMICAL BIOLOGY                                 | 1 |
| ACTA PHYSIOLOGICA                                    | 1 |
| ACTA VETERINARIA BRNO                                | 1 |
| ADVANCES IN CLINICAL AND EXPERIMENTAL MEDICINE       | 1 |
| ADVANCES IN POLYMER SCIENCE                          | 1 |
| AESTHETIC SURGERY JOURNAL                            | 1 |
| AMERICAN JOURNAL OF MEDICAL GENETICS                 | 1 |
| AMERICAN JOURNAL OF ROENTGENOLOGY                    | 1 |
| AMERICAN JOURNAL OF SURGICAL PATHOLOGY               | 1 |
| ANATOMY AND EMBRYOLOGY                               | 1 |
| ANKARA UNIVERSITESI VETERINER FAKULTESI DERGISI      | 1 |
| ANNALS ACADEMY OF MEDICINE SINGAPORE                 | 1 |
| ANNALS OF HEMATOLOGY                                 | 1 |
| ANNALS OF THE RHEUMATIC DISEASES                     | 1 |
| ANNUAL REVIEW OF BIOMEDICAL ENGINEERING VOL 14       | 1 |
| ANNUAL REVIEW OF BIOMEDICAL ENGINEERING VOL 15       | 1 |
| ANNUAL REVIEW OF BIOMEDICAL ENGINEERING VOL 20       | 1 |
| ANNUAL REVIEW OF CELL AND DEVELOPMENTAL BIOLOGY      | 1 |
| ANTI CANCER DRUGS                                    | 1 |
| APPLIED BIONICS AND BIOMECHANICS                     | 1 |
| APPLIED MATERIALS TODAY                              | 1 |

|                                                       |   |
|-------------------------------------------------------|---|
| APPLIED SCIENCES BASEL                                | 1 |
| ARCHIVES OF ORAL BIOLOGY                              | 1 |
| ARCHIVES OF PATHOLOGY LABORATORY MEDICINE             | 1 |
| ARCHIVES OF PHARMACAL RESEARCH                        | 1 |
| ARCHIVUM IMMUNOLOGIAE ET THERAPIAE EXPERIMENTALIS     | 1 |
| ARQUIVO BRASILEIRO DE MEDICINA VETERINARIA E ZOOTECN  | 1 |
| ARTHRITIS AND RHEUMATISM                              | 1 |
| AUSTRALIAN DENTAL JOURNAL                             | 1 |
| BEST PRACTICE RESEARCH IN CLINICAL RHEUMATOLOGY       | 1 |
| BIOCHEMICAL ENGINEERING JOURNAL                       | 1 |
| BIOCHEMICAL PHARMACOLOGY                              | 1 |
| BIOCONJUGATE CHEMISTRY                                | 1 |
| BIOENGINEERING BASEL                                  | 1 |
| BIOLOGICAL PHARMACEUTICAL BULLETIN                    | 1 |
| BIOMEDICAL APPLICATIONS OF POLYMERIC NANOFIBERS       | 1 |
| BIOMEDICAL MICRODEVICES                               | 1 |
| BIOMEDICAL OPTICS EXPRESS                             | 1 |
| BIOMEDICINE PHARMACOTHERAPY                           | 1 |
| BIOMEDICINES                                          | 1 |
| BIOMOLECULES                                          | 1 |
| BIOPHYSICAL JOURNAL                                   | 1 |
| BIOREACTOR SYSTEMS FOR TISSUE ENGINEERING             | 1 |
| BIOREACTOR SYSTEMS FOR TISSUE ENGINEERING II STRATEGI | 1 |
| BIOSCIENCE REPORTS                                    | 1 |
| BIOTECHNOLOGY AND APPLIED BIOCHEMISTRY                | 1 |
| BIOTECHNOLOGY PROGRESS                                | 1 |
| BMC BIOTECHNOLOGY                                     | 1 |
| BMC COMPLEMENTARY AND ALTERNATIVE MEDICINE            | 1 |
| BMC DEVELOPMENTAL BIOLOGY                             | 1 |
| BMC MOLECULAR BIOLOGY                                 | 1 |
| BMJ OPEN                                              | 1 |
| BONE MORPHOGENIC PROTEIN                              | 1 |
| BRAZILIAN JOURNAL OF MEDICAL AND BIOLOGICAL RESEARC   | 1 |
| BREAST CANCER RESEARCH                                | 1 |
| BRITISH JOURNAL OF DERMATOLOGY                        | 1 |
| BRITISH JOURNAL OF HAEMATOLOGY                        | 1 |
| BRITISH JOURNAL OF HOSPITAL MEDICINE                  | 1 |
| BRITISH JOURNAL OF PHARMACOLOGY                       | 1 |
| BRITISH JOURNAL OF RADIOLOGY                          | 1 |
| BULLETIN OF EXPERIMENTAL BIOLOGY AND MEDICINE         | 1 |
| CANADIAN JOURNAL OF PHYSIOLOGY AND PHARMACOLOGY       | 1 |
| CANCER CELL                                           | 1 |
| CARDIOVASCULAR DRUGS AND THERAPY                      | 1 |
| CELL                                                  | 1 |
| CELL BIOLOGY AND TRANSLATIONAL MEDICINE VOL 2 APPRO   | 1 |

|                                                      |   |
|------------------------------------------------------|---|
| CELL BIOLOGY AND TRANSLATIONAL MEDICINE VOL 5 STEM C | 1 |
| CELLULAR AND MOLECULAR BIOENGINEERING                | 1 |
| CELLULAR AND MOLECULAR BIOLOGY                       | 1 |
| CELLULAR AND MOLECULAR LIFE SCIENCES                 | 1 |
| CHEMICAL ENGINEERING JOURNAL                         | 1 |
| CHEMICAL REVIEWS                                     | 1 |
| CHEMISTRY AND PHYSICS OF LIPIDS                      | 1 |
| CHINESE JOURNAL OF PHYSIOLOGY                        | 1 |
| CLINICA TERAPEUTICA                                  | 1 |
| CLINICAL ANATOMY                                     | 1 |
| CLINICAL AND EXPERIMENTAL PHARMACOLOGY AND PHYSIO]   | 1 |
| CLINICAL AND EXPERIMENTAL RHEUMATOLOGY               | 1 |
| CLINICAL BIOMECHANICS                                | 1 |
| CLINICAL CANCER RESEARCH                             | 1 |
| CLINICAL SCIENCE                                     | 1 |
| CLINICS IN DERMATOLOGY                               | 1 |
| COLD SPRING HARBOR PERSPECTIVES IN BIOLOGY           | 1 |
| COMPARATIVE MEDICINE                                 | 1 |
| COMPTES RENDUS DE L ACADEMIE BULGARE DES SCIENCES    | 1 |
| CONTRAST MEDIA MOLECULAR IMAGING                     | 1 |
| CRITICAL REVIEWS IN THERAPEUTIC DRUG CARRIER SYSTEMS | 1 |
| CURRENT MEDICINAL CHEMISTRY                          | 1 |
| CURRENT OPINION IN BIOTECHNOLOGY                     | 1 |
| CURRENT OPINION IN IMMUNOLOGY                        | 1 |
| CURRENT ORTHOPAEDICS                                 | 1 |
| CURRENT RHEUMATOLOGY REPORTS                         | 1 |
| CYTOKINE GROWTH FACTOR REVIEWS                       | 1 |
| DERMATOLOGY                                          | 1 |
| DEUTSCHE ZEITSCHRIFT FUR SPORTMEDIZIN                | 1 |
| DIABETES METABOLISM RESEARCH AND REVIEWS             | 1 |
| DISEASE MODELS MECHANISMS                            | 1 |
| EBIOMEDICINE                                         | 1 |
| EFORT OPEN REVIEWS                                   | 1 |
| EUROPEAN BIOPHYSICS JOURNAL WITH BIOPHYSICS LETTERS  | 1 |
| EUROPEAN JOURNAL OF HISTOCHEMISTRY                   | 1 |
| EXPERIMENTAL AND MOLECULAR MEDICINE                  | 1 |
| EXPERIMENTAL EYE RESEARCH                            | 1 |
| EXPERIMENTAL HEMATOLOGY                              | 1 |
| EXPERIMENTAL MECHANICS                               | 1 |
| EXPERT OPINION ON DRUG SAFETY                        | 1 |
| EXPERT OPINION ON ORPHAN DRUGS                       | 1 |
| EXPERT OPINION ON PHARMACOTHERAPY                    | 1 |
| EXPERT REVIEW OF MEDICAL DEVICES                     | 1 |
| FEBS LETTERS                                         | 1 |
| FEBS OPEN BIO                                        | 1 |

|                                                      |   |
|------------------------------------------------------|---|
| FOOT AND ANKLE SURGERY                               | 1 |
| FOOT ANKLE INTERNATIONAL                             | 1 |
| FRONTIERS IN CHEMISTRY                               | 1 |
| FRONTIERS IN GENETICS                                | 1 |
| FRONTIERS IN INTEGRATIVE NEUROSCIENCE                | 1 |
| GENE THERAPY                                         | 1 |
| GENES                                                | 1 |
| GENESIS                                              | 1 |
| GENETICS AND MOLECULAR RESEARCH                      | 1 |
| GROWTH HORMONE IGF RESEARCH                          | 1 |
| HAND CLINICS                                         | 1 |
| HIP INTERNATIONAL                                    | 1 |
| HISTOCHEMISTRY AND CELL BIOLOGY                      | 1 |
| HUMAN CELL                                           | 1 |
| HUMAN GENE THERAPY                                   | 1 |
| IEEE TRANSACTIONS ON NANOBIOSCIENCE                  | 1 |
| ILAR JOURNAL                                         | 1 |
| INDIAN JOURNAL OF ORTHOPAEDICS                       | 1 |
| INFLAMMATION                                         | 1 |
| INTERNATIONAL IMMUNOPHARMACOLOGY                     | 1 |
| INTERNATIONAL JOURNAL OF APPLIED RESEARCH IN VETERIN | 1 |
| INTERNATIONAL JOURNAL OF DEVELOPMENTAL BIOLOGY       | 1 |
| INTERNATIONAL JOURNAL OF HUMAN GENETICS              | 1 |
| INTERNATIONAL JOURNAL OF IMMUNOPATHOLOGY AND PHAF    | 1 |
| INTERNATIONAL JOURNAL OF MEDICAL SCIENCES            | 1 |
| INTERNATIONAL JOURNAL OF ORAL AND MAXILLOFACIAL SUI  | 1 |
| INTERNATIONAL JOURNAL OF PEPTIDE RESEARCH AND THERA  | 1 |
| INTERNATIONAL JOURNAL OF PHARMACEUTICS               | 1 |
| INTERNATIONAL JOURNAL OF SHOULDER SURGERY            | 1 |
| INTERNATIONAL JOURNAL OF SPORTS MEDICINE             | 1 |
| INTERNATIONAL REVIEW OF CELL AND MOLECULAR BIOLOGY   | 1 |
| INTERNATIONAL REVIEW OF CELL AND MOLECULAR BIOLOGY   | 1 |
| IRANIAN JOURNAL OF VETERINARY RESEARCH               | 1 |
| ISRAEL MEDICAL ASSOCIATION JOURNAL                   | 1 |
| IUBMB LIFE                                           | 1 |
| JOURNAL OF ANIMAL AND VETERINARY ADVANCES            | 1 |
| JOURNAL OF ANIMAL SCIENCE                            | 1 |
| JOURNAL OF BIOLOGICAL ENGINEERING                    | 1 |
| JOURNAL OF BIOLOGICAL REGULATORS AND HOMEOSTATIC A   | 1 |
| JOURNAL OF BIOLOGICAL RESEARCH THESSALONIKI          | 1 |
| JOURNAL OF BIOMEDICAL OPTICS                         | 1 |
| JOURNAL OF BIOSCIENCE AND BIOENGINEERING             | 1 |
| JOURNAL OF CLINICAL PERIODONTOLOGY                   | 1 |
| JOURNAL OF COMPARATIVE PATHOLOGY                     | 1 |
| JOURNAL OF CRANIO MAXILLOFACIAL SURGERY              | 1 |

|                                                      |   |
|------------------------------------------------------|---|
| JOURNAL OF CUTANEOUS PATHOLOGY                       | 1 |
| JOURNAL OF DENTAL RESEARCH                           | 1 |
| JOURNAL OF ENVIRONMENTAL PROTECTION AND ECOLOGY      | 1 |
| JOURNAL OF EXPERIMENTAL BIOLOGY                      | 1 |
| JOURNAL OF FORENSIC SCIENCES                         | 1 |
| JOURNAL OF HAND THERAPY                              | 1 |
| JOURNAL OF HEMATOTHERAPY STEM CELL RESEARCH          | 1 |
| JOURNAL OF HISTOCHEMISTRY CYTOCHEMISTRY              | 1 |
| JOURNAL OF HUAZHONG UNIVERSITY OF SCIENCE AND TECHN  | 1 |
| JOURNAL OF IMMUNOLOGY                                | 1 |
| JOURNAL OF INDUSTRIAL AND ENGINEERING CHEMISTRY      | 1 |
| JOURNAL OF INFLAMMATION RESEARCH                     | 1 |
| JOURNAL OF INTERNATIONAL MEDICAL RESEARCH            | 1 |
| JOURNAL OF MATERIALS SCIENCE                         | 1 |
| JOURNAL OF MECHANICS IN MEDICINE AND BIOLOGY         | 1 |
| JOURNAL OF MEDICAL IMAGING AND HEALTH INFORMATICS    | 1 |
| JOURNAL OF MEDICINAL FOOD                            | 1 |
| JOURNAL OF MOLECULAR CELL BIOLOGY                    | 1 |
| JOURNAL OF MORPHOLOGY                                | 1 |
| JOURNAL OF MUSCLE RESEARCH AND CELL MOTILITY         | 1 |
| JOURNAL OF NANOBIO TECHNOLOGY                        | 1 |
| JOURNAL OF NANOSCIENCE AND NANOTECHNOLOGY            | 1 |
| JOURNAL OF NEUROPHYSIOLOGY                           | 1 |
| JOURNAL OF PATHOLOGY                                 | 1 |
| JOURNAL OF PERIODONTAL RESEARCH                      | 1 |
| JOURNAL OF PHOTOCHEMISTRY AND PHOTOBIOLOGY B BIOLO   | 1 |
| JOURNAL OF PLASTIC SURGERY AND HAND SURGERY          | 1 |
| JOURNAL OF PROTEOME RESEARCH                         | 1 |
| JOURNAL OF SPORTS MEDICINE AND PHYSICAL FITNESS      | 1 |
| JOURNAL OF THE NEUROLOGICAL SCIENCES                 | 1 |
| JOURNAL OF VETERINARY MEDICAL SCIENCE                | 1 |
| JOURNAL OF VETERINARY SCIENCE                        | 1 |
| JOURNAL OF WOUND CARE                                | 1 |
| JOURNAL OF ZHEJIANG UNIVERSITY SCIENCE B             | 1 |
| KAFKAS UNIVERSITESI VETERINER FAKULTESI DERGISI      | 1 |
| LABORATORY ANIMALS                                   | 1 |
| LANCET HAEMATOLOGY                                   | 1 |
| LIFE SCIENCE JOURNAL ACTA ZHENGZHOU UNIVERSITY OVERS | 1 |
| LIFE SCIENCES                                        | 1 |
| MACROMOLECULAR RAPID COMMUNICATIONS                  | 1 |
| MARINE DRUGS                                         | 1 |
| MATERIALWISSENSCHAFT UND WERKSTOFFTECHNIK            | 1 |
| MEASUREMENT SCIENCE AND TECHNOLOGY                   | 1 |
| MECHANISMS OF AGEING AND DEVELOPMENT                 | 1 |
| MEDICINA LITHUANIA                                   | 1 |

|                                                   |   |
|---------------------------------------------------|---|
| METHODS                                           | 1 |
| METHODS IN CELL BIOLOGY                           | 1 |
| MICRO NANO LETTERS                                | 1 |
| MICROMACHINES                                     | 1 |
| MICRON                                            | 1 |
| MICROSYSTEMS NANOENGINEERING                      | 1 |
| MODERN RHEUMATOLOGY                               | 1 |
| MOLECULAR AND CELLULAR BIOLOGY                    | 1 |
| MOLECULAR BIOTECHNOLOGY                           | 1 |
| MOLECULAR CELL                                    | 1 |
| MOLECULAR PAIN                                    | 1 |
| MOLECULES                                         | 1 |
| MRS COMMUNICATIONS                                | 1 |
| NANO LETTERS                                      | 1 |
| NANOMATERIALS                                     | 1 |
| NANOSCALE ADVANCES                                | 1 |
| NATURE CELL BIOLOGY                               | 1 |
| NATURE PROTOCOLS                                  | 1 |
| NATURWISSENSCHAFTEN                               | 1 |
| NEUROPATHOLOGY                                    | 1 |
| NEUROSURGICAL FOCUS                               | 1 |
| NEW ZEALAND VETERINARY JOURNAL                    | 1 |
| NMR IN BIOMEDICINE                                | 1 |
| ONCOLOGY LETTERS                                  | 1 |
| OPEN LIFE SCIENCES                                | 1 |
| ORAL DISEASES                                     | 1 |
| ORGAN DEVELOPMENT                                 | 1 |
| ORGANOGENESIS                                     | 1 |
| OSTEOARTHRITIS AND CARTILAGE                      | 1 |
| OSTEOCHONDRAL TISSUE ENGINEERING NANOTECHNOLOGY S | 1 |
| PAIN AND THERAPY                                  | 1 |
| PAIN MEDICINE                                     | 1 |
| PAIN PHYSICIAN                                    | 1 |
| PAKISTAN VETERINARY JOURNAL                       | 1 |
| PATHOBIOLOGY                                      | 1 |
| PATHOLOGY                                         | 1 |
| PATHOLOGY RESEARCH AND PRACTICE                   | 1 |
| PEDIATRIC HEMATOLOGY AND ONCOLOGY                 | 1 |
| PEDIATRIC RESEARCH                                | 1 |
| PESQUISA VETERINARIA BRASILEIRA                   | 1 |
| PHARMACEUTICAL BIOLOGY                            | 1 |
| PHOTOCHEMISTRY AND PHOTOBIOLOGY                   | 1 |
| PHYSICAL THERAPY                                  | 1 |
| PLOS NEGLECTED TROPICAL DISEASES                  | 1 |
| POLYMER TESTING                                   | 1 |

|                                                               |   |
|---------------------------------------------------------------|---|
| POLYMERS FOR ADVANCED TECHNOLOGIES                            | 1 |
| PREPARATIVE BIOCHEMISTRY BIOTECHNOLOGY                        | 1 |
| PROGRESS IN HERITABLE SOFT CONNECTIVE TISSUE DISEASES         | 1 |
| PROGRESS IN NATURAL SCIENCE MATERIALS INTERNATIONAL           | 1 |
| PROGRESS IN POLYMER SCIENCE                                   | 1 |
| RADIOLOGY                                                     | 1 |
| RAPID PROTOTYPING JOURNAL                                     | 1 |
| REPRODUCTION IN DOMESTIC ANIMALS                              | 1 |
| REVIEW OF SCIENTIFIC INSTRUMENTS                              | 1 |
| RHEUMATOLOGY INTERNATIONAL                                    | 1 |
| SAINS MALAYSIANA                                              | 1 |
| SCANDINAVIAN JOURNAL OF PLASTIC AND RECONSTRUCTIVE<br>SCIENCE | 1 |
| SEMINA CIENCIAS AGRARIAS                                      | 1 |
| SEMINARS IN PEDIATRIC SURGERY                                 | 1 |
| SEMINARS IN PLASTIC SURGERY                                   | 1 |
| SEMINARS IN THROMBOSIS AND HEMOSTASIS                         | 1 |
| SENSORS AND ACTUATORS B CHEMICAL                              | 1 |
| SKELETAL BIOLOGY AND MEDICINE PT B                            | 1 |
| SLAS TECHNOLOGY                                               | 1 |
| SLOVENIAN VETERINARY RESEARCH                                 | 1 |
| SMALL                                                         | 1 |
| SPINE                                                         | 1 |
| STEM CELL REVIEWS                                             | 1 |
| SURGEON JOURNAL OF THE ROYAL COLLEGES OF SURGEONS C           | 1 |
| SURGICAL AND RADIOLOGIC ANATOMY                               | 1 |
| SURGICAL INNOVATION                                           | 1 |
| SWISS MEDICAL WEEKLY                                          | 1 |
| THERANOSTICS                                                  | 1 |
| TISSUE CELL                                                   | 1 |
| TRANSFUSION AND APHERESIS SCIENCE                             | 1 |
| TRENDS IN CARDIOVASCULAR MEDICINE                             | 1 |
| TRENDS IN MOLECULAR MEDICINE                                  | 1 |
| TRIALS                                                        | 1 |
| ULTRASCHALL IN DER MEDIZIN                                    | 1 |
| ULTRASONICS                                                   | 1 |
| ULTRASOUND QUARTERLY                                          | 1 |
| ULUSAL TRAVMA VE ACIL CERRAHI DERGISI TURKISH JOURNA          | 1 |
| VETERINARY CLINICAL PATHOLOGY                                 | 1 |
| VETERINARY IMMUNOLOGY AND IMMUNOPATHOLOGY                     | 1 |
| VETERINARY RADIOLOGY ULTRASOUND                               | 1 |
| VETERINARY RESEARCH FORUM                                     | 1 |
| VITAMINS AND HORMONES                                         | 1 |
| VLAAMS DIERGENEESKUNDIG TIJDSCHRIFT                           | 1 |
| VOJNOSANITETSKI PREGLED                                       | 1 |

|                                                  |   |
|--------------------------------------------------|---|
| WORLD JOURNAL OF GASTROENTEROLOGY                | 1 |
| WORLD NEUROSURGERY                               | 1 |
| ZEBRAFISH DISEASE MODELS AND CHEMICAL SCREENS    | 1 |
| ZEITSCHRIFT FUR ORTHOPADIE UND IHRE GRENZGEBIETE | 1 |
