# Supplementary material for: Global Research Trends in Tendon Stem Cells from 1991 to 2020: A Bibliometric and Visualized Study
Source: Hindawi journal article supplement (doi:10.1155/2022/7937765), 2022-06-18
Supplement: f3 [file 7937765.f3.pdf]

Supplementary Table 3. Institutions and number of papers published on tendon stem cells from 1991 to 2020.

| Institutions                   | Number of papers |
|--------------------------------|------------------|
| UNIV PITTSBURGH                | 96               |
| ZHEJIANG UNIV                  | 70               |
| CHINESE UNIV HONG KONG         | 64               |
| SHANGHAI JIAO TONG UNIV        | 64               |
| STANFORD UNIV                  | 50               |
| MAYO CLIN                      | 48               |
| UNIV CONNECTICUT               | 45               |
| NATL UNIV SINGAPORE            | 44               |
| HOSP SPECIAL SURG              | 40               |
| UNIV MINHO                     | 39               |
| HARVARD UNIV                   | 38               |
| THIRD MIL MED UNIV             | 37               |
| UNIV CINCINNATI                | 36               |
| UNIV PENN                      | 36               |
| COLUMBIA UNIV                  | 35               |
| UNIV ILLINOIS                  | 33               |
| UNIV MILAN                     | 31               |
| CORNELL UNIV                   | 30               |
| WASHINGTON UNIV                | 30               |
| QUEEN MARY UNIV LONDON         | 27               |
| ICVS 3BS PT GOVT ASSOCIATE LAB | 25               |
| CASE WESTERN RESERVE UNIV      | 24               |
| TONGJI UNIV                    | 23               |
| UNIV OXFORD                    | 23               |
| KEELE UNIV                     | 22               |
| SWISS FED INST TECHNOL         | 22               |
| UNIV CALIF DAVIS               | 22               |
| PEKING UNIV                    | 21               |
| SICHUAN UNIV                   | 21               |
| TECH UNIV MUNICH               | 21               |
| CHINESE ACAD SCI               | 20               |
| IRCCS IST ORTOPED GALEAZZI     | 20               |
| SOUTHEAST UNIV                 | 20               |
| UNIV LIVERPOOL                 | 20               |
| UNIV MICHIGAN                  | 20               |
| UNIV REGENSBURG                | 20               |
| COLORADO STATE UNIV            | 19               |
| SOUTHERN MED UNIV              | 19               |
| UNIV LEIPZIG                   | 19               |
| UNIV SALERNO                   | 19               |

|                                         |    |
|-----------------------------------------|----|
| CHONGQING UNIV                          | 18 |
| HARVARD MED SCH                         | 18 |
| KOBE UNIV                               | 18 |
| SEOUL NATL UNIV                         | 18 |
| UNIV CALIF LOS ANGELES                  | 18 |
| UNIV COLL LONDON                        | 18 |
| UNIV HONG KONG                          | 18 |
| GEORGIA INST TECHNOL                    | 17 |
| VIRGINIA TECH                           | 17 |
| HIROSHIMA UNIV                          | 16 |
| KYOTO UNIV                              | 16 |
| NAGOYA UNIV                             | 16 |
| TUFTS UNIV                              | 16 |
| CHINA ORTHOPED REGENERAT MED GRP CORMED | 15 |
| TOKYO MED DENT UNIV                     | 15 |
| UCL                                     | 15 |
| UNIV CAMBRIDGE                          | 15 |
| UNIV EDINBURGH                          | 15 |
| UNIV MANCHESTER                         | 15 |
| UNIV MUNICH                             | 15 |
| UNIV TERAMO                             | 15 |
| ANIM HLTH TRUST                         | 14 |
| FUDAN UNIV                              | 14 |
| HANNOVER MED SCH                        | 14 |
| SOOCHOW UNIV                            | 14 |
| UNIV G DANNUNZIO                        | 14 |
| UNIV ROCHESTER                          | 14 |
| UNIV ZURICH                             | 14 |
| EMORY UNIV                              | 13 |
| HOSP AUTHOR                             | 13 |
| ICAHN SCH MED MT SINAI                  | 13 |
| ROYAL NATL ORTHOPAED HOSP               | 13 |
| ROYAL VET COLL                          | 13 |
| UNIV LONDON ROYAL VET COLL              | 13 |
| UNIV WISCONSIN                          | 13 |
| VET AFFAIRS PALO ALTO HLTH CARE SYST    | 13 |
| CHARITE                                 | 12 |
| DONGGUK UNIV                            | 12 |
| DONGHUA UNIV                            | 12 |
| NATL TAIWAN UNIV                        | 12 |
| PURDUE UNIV                             | 12 |
| SECOND MIL MED UNIV                     | 12 |
| UNIV FLORIDA                            | 12 |
| UNIV PADUA                              | 12 |
| UNIV VIRGINIA                           | 12 |

|                                                 |    |
|-------------------------------------------------|----|
| UNIV WESTERN AUSTRALIA                          | 12 |
| WENZHOU MED UNIV                                | 12 |
| CENT S UNIV                                     | 11 |
| CHONGQING MED UNIV                              | 11 |
| HARBIN MED UNIV                                 | 11 |
| HEADQUARTERS UNIV MINHO                         | 11 |
| JOHNS HOPKINS UNIV                              | 11 |
| MIT                                             | 11 |
| NATL TISSUE ENGN CTR CHINA                      | 11 |
| NORTH CAROLINA STATE UNIV                       | 11 |
| PARACELSUS MED UNIV                             | 11 |
| PRINCE WALES HOSP                               | 11 |
| UNIV BOLOGNA                                    | 11 |
| UNIV CALIF SAN DIEGO                            | 11 |
| YONSEI UNIV                                     | 11 |
| ZHEJIANG PROV KEY LAB TISSUE ENGN REGENERAT MED | 11 |
| CHINA ORTHOPED REGENERAT MED GRP                | 10 |
| NANJING MED UNIV                                | 10 |
| SAO PAULO STATE UNIV                            | 10 |
| SCRIPPS RES INST                                | 10 |
| UNIV CALIF SAN FRANCISCO                        | 10 |
| UNIV UTRECHT                                    | 10 |
| CNR                                             | 9  |
| DUKE UNIV                                       | 9  |
| OHIO STATE UNIV                                 | 9  |
| OSIRIS THERAPEUT INC                            | 9  |
| SHRINERS HOSP CHILDREN                          | 9  |
| TSINGHUA UNIV                                   | 9  |
| UNIV GHENT                                      | 9  |
| UNIV LONDON                                     | 9  |
| VA PALO ALTO HLTH CARE SYST                     | 9  |
| BRIGHAM WOMENS HOSP                             | 8  |
| CAPITAL MED UNIV                                | 8  |
| CHINA MED UNIV                                  | 8  |
| CRUCES UNIV HOSP                                | 8  |
| ETH                                             | 8  |
| FREE UNIV BERLIN                                | 8  |
| INSERM                                          | 8  |
| KAROLINSKA INST                                 | 8  |
| KEY LAB ORGAN INJURY AGING REGENERAT MED HUNAN  | 8  |
| KONKUK UNIV                                     | 8  |
| LMU                                             | 8  |
| MONASH UNIV                                     | 8  |
| NANYANG TECHNOL UNIV                            | 8  |
| NATL UNIV IRELAND GALWAY                        | 8  |

|                                                   |   |
|---------------------------------------------------|---|
| QUEENSLAND UNIV TECHNOL                           | 8 |
| RIZZOLI ORTHOPED INST                             | 8 |
| RUSH UNIV                                         | 8 |
| STEADMAN PHILIPPON RES INST                       | 8 |
| TOHOKU UNIV                                       | 8 |
| UMEA UNIV                                         | 8 |
| UNIV GIESSEN                                      | 8 |
| UNIV MARYLAND                                     | 8 |
| UNIV VET MED HANNOVER                             | 8 |
| UNIV WASHINGTON                                   | 8 |
| WROCLAW UNIV ENVIRONM LIFE SCI                    | 8 |
| WUHAN UNIV                                        | 8 |
| XI AN JIAO TONG UNIV                              | 8 |
| ALBERT EINSTEIN COLL MED                          | 7 |
| BOSTON UNIV                                       | 7 |
| CENT SOUTH UNIV                                   | 7 |
| CHANG GUNG UNIV                                   | 7 |
| CHARITE UNIV MED BERLIN                           | 7 |
| CHILDRENS HOSP PHILADELPHIA                       | 7 |
| CHINESE PEOPLES LIBERAT ARMY GEN HOSP             | 7 |
| FERDOWSI UNIV MASHHAD                             | 7 |
| FOURTH MIL MED UNIV                               | 7 |
| HEBREW UNIV JERUSALEM                             | 7 |
| IRCCS POLICLIN SAN DONATO                         | 7 |
| JUNTENDO UNIV                                     | 7 |
| MASSACHUSETTS GEN HOSP                            | 7 |
| MED UNIV PLOVDIV                                  | 7 |
| MEDSTAR UNION MEM HOSP                            | 7 |
| MILE END HOSP                                     | 7 |
| NORTHWESTERN UNIV                                 | 7 |
| OKAYAMA UNIV                                      | 7 |
| OSAKA UNIV                                        | 7 |
| PENN STATE UNIV                                   | 7 |
| SHANGHAI JIAO TONG UNIV AFFILIATED PEOPLES HOSP 6 | 7 |
| SUN YAT SEN UNIV                                  | 7 |
| TECHNION ISRAEL INST TECHNOL                      | 7 |
| THOMAS JEFFERSON UNIV                             | 7 |
| TULANE UNIV                                       | 7 |
| UNIV BERN                                         | 7 |
| UNIV COPENHAGEN                                   | 7 |
| UNIV DELAWARE                                     | 7 |
| UNIV GUELPH                                       | 7 |
| UNIV KANSAS                                       | 7 |
| UNIV LEEDS                                        | 7 |
| UNIV MALAYA                                       | 7 |

|                                        |   |
|----------------------------------------|---|
| UNIV MED CTR UTRECHT                   | 7 |
| UNIV SHEFFIELD                         | 7 |
| UNIV SO CALIF                          | 7 |
| UNIV SOUTHERN CALIF                    | 7 |
| UNIV TORONTO                           | 7 |
| WRIGHT STATE UNIV                      | 7 |
| ANHUI MED UNIV                         | 6 |
| AUSTRIAN CLUSTER TISSUE REGENERAT      | 6 |
| CAMPUS BIOMED UNIV                     | 6 |
| CENTENO SCHULTZ CLIN                   | 6 |
| CHUNG ANG UNIV                         | 6 |
| CINCINNATI SPORTSMED ORTHOPAED CTR INC | 6 |
| CLEVELAND CLIN                         | 6 |
| CNRS                                   | 6 |
| EINDHOVEN UNIV TECHNOL                 | 6 |
| HOKKAIDO UNIV                          | 6 |
| HUAZHONG UNIV SCI TECHNOL              | 6 |
| JILIN UNIV                             | 6 |
| KYOTO PREFECTURAL UNIV MED             | 6 |
| KYUNG HEE UNIV                         | 6 |
| LOUISIANA STATE UNIV                   | 6 |
| LUDWIG MAXIMILIANS UNIV MUNCHEN        | 6 |
| NANJING UNIV                           | 6 |
| NANTONG UNIV                           | 6 |
| NATL TAIWAN UNIV HOSP                  | 6 |
| NYU                                    | 6 |
| OREGON HLTH SCI UNIV                   | 6 |
| RUTGERS STATE UNIV                     | 6 |
| SHANDONG UNIV                          | 6 |
| SHANGHAI SIXTH PEOPLES HOSP            | 6 |
| STEADMAN CLIN                          | 6 |
| SUNGKYUNKWAN UNIV                      | 6 |
| TEXAS A M UNIV                         | 6 |
| UNIV CALGARY                           | 6 |
| UNIV CAMERINO                          | 6 |
| UNIV CONNECTICUT HLTH                  | 6 |
| UNIV N CAROLINA                        | 6 |
| UNIV NEBRASKA MED CTR                  | 6 |
| UNIV PARIS 06                          | 6 |
| UNIV POLITECN MARCHE                   | 6 |
| UNIV SYDNEY                            | 6 |
| UNIV TOKYO                             | 6 |
| UNIV TWENTE                            | 6 |
| UNIV UTAH                              | 6 |
| UNIV WURZBURG                          | 6 |

|                                                      |   |
|------------------------------------------------------|---|
| UNIV ZARAGOZA                                        | 6 |
| UPMC UNIV PARIS 06                                   | 6 |
| CATHOLIC UNIV DAEGU                                  | 5 |
| CEDARS SINAI MED CTR                                 | 5 |
| CREIGHTON UNIV                                       | 5 |
| GRIFFITH UNIV                                        | 5 |
| HACETTEPE UNIV                                       | 5 |
| IOWA STATE UNIV                                      | 5 |
| IRCCS GALEAZZI ORTHOPAED INST                        | 5 |
| JUSTUS LIEBIG UNIV GIESSEN                           | 5 |
| KENSEY NASH CORP                                     | 5 |
| KOREA UNIV                                           | 5 |
| KUMAMOTO UNIV                                        | 5 |
| KURUME UNIV                                          | 5 |
| KYUNGPOOK NATL UNIV                                  | 5 |
| MCGILL UNIV                                          | 5 |
| MRC ARTHRIT RES UK CTR INTEGRATED RES<br>MUSCULOSKEL | 5 |
| NATL UNIV IRELAND GALWAY NUI GALWAY                  | 5 |
| NATL UNIV SINGAPORE HOSP                             | 5 |
| NATL YANG MING UNIV                                  | 5 |
| NIBR                                                 | 5 |
| OSAKA HLTH SCI UNIV                                  | 5 |
| OSIRIS THERAPEUT                                     | 5 |
| PEKING UNIV THIRD HOSP                               | 5 |
| RIZZOLI ORTHOPAED INST                               | 5 |
| ROYAL COLL SURGEONS IRELAND                          | 5 |
| SAMSUNG MED CTR                                      | 5 |
| TAIPEI VET GEN HOSP                                  | 5 |
| TECH UNIV DRESDEN                                    | 5 |
| TEL AVIV UNIV                                        | 5 |
| TRINITY COLL DUBLIN                                  | 5 |
| UNIV ALABAMA BIRMINGHAM                              | 5 |
| UNIV BIRMINGHAM                                      | 5 |
| UNIV CANTABRIA                                       | 5 |
| UNIV CATTOLICA SACRO CUORE                           | 5 |
| UNIV COLOGNE                                         | 5 |
| UNIV GLASGOW                                         | 5 |
| UNIV GOTHENBURG                                      | 5 |
| UNIV HOSP                                            | 5 |
| UNIV MED DENT NEW JERSEY                             | 5 |
| UNIV MISSOURI                                        | 5 |
| UNIV NEW S WALES                                     | 5 |
| UNIV OKLAHOMA                                        | 5 |
| UNIV PORTO                                           | 5 |

|                                           |   |
|-------------------------------------------|---|
| UNIV S FLORIDA                            | 5 |
| UNIV SAO PAULO                            | 5 |
| UNIV TURIN                                | 5 |
| UNIV ULM                                  | 5 |
| XIANGYA HOSP                              | 5 |
| ZUNYI MED UNIV                            | 5 |
| ACECR                                     | 4 |
| ANKARA UNIV                               | 4 |
| ARMY MED UNIV                             | 4 |
| BEIHANG UNIV                              | 4 |
| BISPEBJERG HOSP                           | 4 |
| BROWN UNIV                                | 4 |
| CARNEGIE MELLON UNIV                      | 4 |
| CATHOLIC UNIV KOREA                       | 4 |
| CHILDRENS HOSP PITTSBURGH                 | 4 |
| CHINA MED UNIV HOSP                       | 4 |
| CHINA ORTHOPAED REGENERAT MED CORMED      | 4 |
| CINCINNATI SPORTS MED ORTHOPAED CTR       | 4 |
| CITY UNIV HONG KONG                       | 4 |
| DANKOOK UNIV                              | 4 |
| DREXEL UNIV                               | 4 |
| ECOLE POLYTECH FED LAUSANNE               | 4 |
| FEINSTEIN INST MED RES                    | 4 |
| GUANGZHOU MED UNIV                        | 4 |
| GUANGZHOU UNIV CHINESE MED                | 4 |
| HEIDELBERG UNIV                           | 4 |
| HULL YORK MED SCH                         | 4 |
| HUMBOLDT UNIV                             | 4 |
| INJE UNIV                                 | 4 |
| IRAN UNIV MED SCI                         | 4 |
| IRCCS                                     | 4 |
| JIKEI UNIV                                | 4 |
| LLR UNIV VET ANIM SCI                     | 4 |
| LOMA LINDA UNIV                           | 4 |
| LUDWIG BOLTZMANN INST EXPT CLIN TRAUMATOL | 4 |
| NAGASAKI UNIV                             | 4 |
| NARA MED UNIV                             | 4 |
| NATL RES CTR EQUINES                      | 4 |
| NATL RES INST CHILD HLTH DEV              | 4 |
| OREGON STATE UNIV                         | 4 |
| POLISH ACAD SCI                           | 4 |
| POLITECN MILAN                            | 4 |
| PT GOVT ASSOCIATE LAB                     | 4 |
| QINGDAO UNIV                              | 4 |
| SHIRAZ UNIV                               | 4 |

|                                                      |   |
|------------------------------------------------------|---|
| SIR CHARLES GAIRDNER HOSP                            | 4 |
| TAIPEI MED UNIV                                      | 4 |
| UCONN HLTH                                           | 4 |
| UNIV ADELAIDE                                        | 4 |
| UNIV ALBERTA                                         | 4 |
| UNIV BARI ALDO MORO                                  | 4 |
| UNIV BASEL HOSP                                      | 4 |
| UNIV CALIF IRVINE                                    | 4 |
| UNIV COIMBRA                                         | 4 |
| UNIV COLL HOSP                                       | 4 |
| UNIV COLORADO                                        | 4 |
| UNIV ESTADUAL PAULISTA                               | 4 |
| UNIV FED SAO PAULO                                   | 4 |
| UNIV GEORGIA                                         | 4 |
| UNIV GOTTINGEN                                       | 4 |
| UNIV LYON 1                                          | 4 |
| UNIV MINNESOTA                                       | 4 |
| UNIV MONTREAL                                        | 4 |
| UNIV NAPLES FEDERICO II                              | 4 |
| UNIV NOTTINGHAM                                      | 4 |
| UNIV OTTAWA                                          | 4 |
| UNIV PARMA                                           | 4 |
| UNIV PORTSMOUTH                                      | 4 |
| UNIV QUEENSLAND                                      | 4 |
| UNIV ROMA LA SAPIENZA                                | 4 |
| UNIV ROMA TOR VERGATA                                | 4 |
| UNIV TEHRAN MED SCI                                  | 4 |
| UNIV VIRGINIA HLTH SYST                              | 4 |
| UNIV ZURICH HOSP                                     | 4 |
| URMIA UNIV                                           | 4 |
| WARSAW UNIV LIFE SCI                                 | 4 |
| WEILL CORNELL MED COLL                               | 4 |
| ZHEJIANG CHINESE MED UNIV                            | 4 |
| AJOU UNIV                                            | 3 |
| ANACURA GRP                                          | 3 |
| ASIA UNIV                                            | 3 |
| ASST CTR SPECIALIST ORTOPED TRAUMATOL GAETANO<br>PIN | 3 |
| BERLIN INST HLTH                                     | 3 |
| BOSTON CHILDRENS HOSP                                | 3 |
| CARDIFF UNIV                                         | 3 |
| CARDIOCTR TICINO                                     | 3 |
| CATHOLIC UNIV                                        | 3 |
| CENT INST RES BUFFALOES                              | 3 |
| CHANG GUNG MEM HOSP                                  | 3 |



|                                                |   |
|------------------------------------------------|---|
| CHINESE PEOPLES LIBERAT ARMY                   | 3 |
| CHONBUK NATL UNIV                              | 3 |
| CUNY CITY COLL                                 | 3 |
| FAC VET MED                                    | 3 |
| FIFA MED CTR EXCELLENCE                        | 3 |
| FLEXCELL INT CORP                              | 3 |
| GIFU UNIV                                      | 3 |
| GOETHE UNIV FRANKFURT                          | 3 |
| GUANGDONG ACAD MED SCI                         | 3 |
| GUANGXI MED UNIV                               | 3 |
| HANYANG UNIV                                   | 3 |
| HEBEI MED UNIV                                 | 3 |
| HELMHOLTZ CTR INFECT RES HZI                   | 3 |
| HONG KONG POLYTECH UNIV                        | 3 |
| HOP ST ELOI                                    | 3 |
| HOSP BRAGA                                     | 3 |
| HOSP VITHAS SAN JOSE                           | 3 |
| HUNAN UNIV                                     | 3 |
| INDIAN INST TECHNOL                            | 3 |
| INDIANA UNIV                                   | 3 |
| INL INT IBERIAN NANOTECHNOL LAB                | 3 |
| INNOVENT EV                                    | 3 |
| IST ZOOPROFILATT SPERIMENTALE LOMBARDIA EMILIA | 3 |
| ISTANBUL UNIV                                  | 3 |
| JINAN UNIV                                     | 3 |
| JUNGWON UNIV                                   | 3 |
| JUSTUS LIEBIG UNIV                             | 3 |
| KIDS RES INST                                  | 3 |
| KOREA INST SCI TECHNOL                         | 3 |
| LEIBNIZ UNIV HANNOVER                          | 3 |
| LUND UNIV                                      | 3 |
| MED UNIV WARSAW                                | 3 |
| MT SINAI HOSP                                  | 3 |
| MT SINAI SCH MED                               | 3 |
| NANCY UNIV                                     | 3 |
| NANTES UNIV HOSP                               | 3 |
| NATL CHENG KUNG UNIV                           | 3 |
| NATL INST DENT CRANIOFACIAL RES                | 3 |
| NEW JERSEY REGENERAT INST                      | 3 |
| NEWCASTLE UNIV                                 | 3 |
| NIPPON MED SCH                                 | 3 |
| NORTH SICHUAN MED COLL                         | 3 |
| NUI GALWAY                                     | 3 |
| PLA                                            | 3 |
| POLITECN TORINO                                | 3 |

|                                  |   |
|----------------------------------|---|
| QUEENS UNIV BELFAST              | 3 |
| RENSSELAER POLYTECH INST         | 3 |
| RICE UNIV                        | 3 |
| ROWAN UNIV                       | 3 |
| SAO PAULO STATE UNIV UNESP       | 3 |
| SEOUL NATL UNIV HOSP             | 3 |
| SHANGHAI 9TH PEOPLES HOSP        | 3 |
| SORBONNE UNIV                    | 3 |
| SOUTHWEST UNIV                   | 3 |
| ST MARYS HOSP                    | 3 |
| STEMTECH GRP                     | 3 |
| STOWERS INST MED RES             | 3 |
| TECH UNIV                        | 3 |
| TIKRIT UNIV                      | 3 |
| TOKAI UNIV                       | 3 |
| UNESP                            | 3 |
| UNIV CALIF BERKELEY              | 3 |
| UNIV CHICAGO                     | 3 |
| UNIV DUISBURG ESSEN              | 3 |
| UNIV DUSSELDORF                  | 3 |
| UNIV ELECT SCI TECHNOL CHINA     | 3 |
| UNIV ESTADUAL CAMPINAS           | 3 |
| UNIV FED MINAS GERAIS            | 3 |
| UNIV GRANADA                     | 3 |
| UNIV HOSP MUNICH                 | 3 |
| UNIV HOSP MUNICH LMU             | 3 |
| UNIV KENTUCKY                    | 3 |
| UNIV MED CTR REGENSBURG          | 3 |
| UNIV MIAMI                       | 3 |
| UNIV NAT RESOURCES LIFE SCI BOKU | 3 |
| UNIV NEBRASKA                    | 3 |
| UNIV NORTH CAROLINA CHAPEL HILL  | 3 |
| UNIV OREGON                      | 3 |
| UNIV PARIS EST                   | 3 |
| UNIV PAVIA                       | 3 |
| UNIV PERUGIA                     | 3 |
| UNIV PISA                        | 3 |
| UNIV POLITECN MADRID             | 3 |
| UNIV ST JOSEPH                   | 3 |
| UNIV TENNESSEE                   | 3 |
| UNIV TEXAS AUSTIN                | 3 |
| UNIV TEXAS HLTH SCI CTR HOUSTON  | 3 |
| UNIV TOLEDO                      | 3 |
| UNIV TRENTO                      | 3 |
| UNIV TUBINGEN                    | 3 |

|                                          |   |
|------------------------------------------|---|
| UNIV ULSAN                               | 3 |
| UNIV VERONA                              | 3 |
| UNIV VITA SALUTE SAN RAFFAELE            | 3 |
| UNIV WESTERN ONTARIO                     | 3 |
| UPMC                                     | 3 |
| USC                                      | 3 |
| VET AFFAIRS MED CTR                      | 3 |
| VIRGINIA POLYTECH INST STATE UNIV        | 3 |
| WARSAW UNIV TECHNOL                      | 3 |
| WESTERN UNIV HLTH SCI                    | 3 |
| WUHAN GEN HOSP GUANGZHOU MIL REG         | 3 |
| XISHAN PEOPLES HOSP                      | 3 |
| ZHEJIANG ACAD MED SCI                    | 3 |
| 88TH HOSP PLA                            | 2 |
| AIR FORCE ENGN UNIV                      | 2 |
| AIRLANGGA UNIV                           | 2 |
| AKDENIZ UNIV                             | 2 |
| ALMA MATER STUDIORUM UNIV BOLOGNA        | 2 |
| ANKARA ONCOL RES TRAINING HOSP           | 2 |
| ARISTOTLE UNIV THESSALONIKI              | 2 |
| ASSUT EUROPE SPA                         | 2 |
| AUSTRIAN ACAD SCI                        | 2 |
| AVANTEA SRL                              | 2 |
| BAOAN DIST PEOPLES HOSP SHENZHEN         | 2 |
| BASKENT UNIV                             | 2 |
| BAYLOR COLL MED                          | 2 |
| BEIJING JISHUITAN HOSP                   | 2 |
| BEIJING MIL REG                          | 2 |
| BENGBU MED COLL                          | 2 |
| BERGMAN CLIN                             | 2 |
| BETH ISRAEL DEACONESS MED CTR            | 2 |
| BIOCRUCES HLTH RES INST                  | 2 |
| BIOMED RES NETWORKING CTR BIOENGN BIOMAT | 2 |
| NANOME                                   | 2 |
| BIONAND                                  | 2 |
| BIOSTAT RETRIEVER                        | 2 |
| BIOTIME INC                              | 2 |
| BST                                      | 2 |
| CHA UNIV                                 | 2 |
| CHANGZHOU 2 PEOPLES HOSP                 | 2 |
| CHILDRENS HOSP                           | 2 |
| CHILDRENS HOSP BOSTON                    | 2 |
| CHINA ORTHOPAED REGENERAT MED GRP CORMED | 2 |
| CHINESE ACAD AGR SCI                     | 2 |
| CHINESE ACAD MED SCI                     | 2 |

|                                       |   |
|---------------------------------------|---|
| CHONGQING FIRST PEOPLES HOSP          | 2 |
| CHONGQING TRADIT CHINESE MED HOSP     | 2 |
| CHONNAM NATL UNIV                     | 2 |
| CHU NANTES                            | 2 |
| CHUNG SHAN MED UNIV                   | 2 |
| CIBER BBN                             | 2 |
| CINCINNATI CHILDRENS HOSP             | 2 |
| CLIN USP LA ESPERANZA                 | 2 |
| COMMUNITY TISSUE SERV                 | 2 |
| COMPLEJO HOSP UNIV A CORUNA           | 2 |
| COORDINATED HLTH                      | 2 |
| CTR HOSP SAO JOAO                     | 2 |
| DALIAN MED UNIV                       | 2 |
| DALIAN MUNICIPAL CENT HOSP            | 2 |
| DEAKIN UNIV                           | 2 |
| DEPT MECH AEROSP ENGN                 | 2 |
| DEPT ORTHOPAED                        | 2 |
| DEPT RIZZOLI RIT                      | 2 |
| DEPT SURG                             | 2 |
| DOKKYO MED UNIV                       | 2 |
| DOSHISHA UNIV                         | 2 |
| DUBLIN CITY UNIV                      | 2 |
| EMPA                                  | 2 |
| ENTE OSPED CANTONALE                  | 2 |
| EOC                                   | 2 |
| EQUINE VET PRACTICE DR SULLS          | 2 |
| ERASMUS MC                            | 2 |
| ESKISEHIR OSMANGAZI UNIV              | 2 |
| EWHA WOMANS UNIV                      | 2 |
| EXPT ZOOPROPHYLACT INST UMBRIA MARCHE | 2 |
| FAC MED                               | 2 |
| FAC MED VET                           | 2 |
| FDN POLIAMBULANZA IST OSPED           | 2 |
| FIRST HOSP JILIN UNIV                 | 2 |
| FLORIDA INST TECHNOL                  | 2 |
| FRED HUTCHINSON CANC RES CTR          | 2 |
| FUJIAN MED UNIV                       | 2 |
| FUJIAN NORMAL UNIV                    | 2 |
| GEN HOSP CHINESE PEOPLES LIBERAT ARMY | 2 |
| GEORGETOWN UNIV                       | 2 |
| GUANGDONG MED UNIV                    | 2 |
| GWANGJU INST SCI TECHNOL              | 2 |
| GWO XI STEM CELL APPL TECHNOL CO LTD  | 2 |
| HALLYM UNIV                           | 2 |
| HANNAM UNIV                           | 2 |

|                                                    |   |
|----------------------------------------------------|---|
| HANNOVER MED SCH MHH                               | 2 |
| HARVARD MIT DIV HLTH SCI TECHNOL                   | 2 |
| HARVARD STEM CELL INST                             | 2 |
| HEALTHBABY BIOTECH HONG KONG CO LTD                | 2 |
| HELMHOLTZ CTR INFECT RES                           | 2 |
| HENAN PROV PEOPLES HOSP                            | 2 |
| HERMINIO OMETTO UNIV CTR UNIARARAS                 | 2 |
| HOP ST ANTOINE                                     | 2 |
| HORMOZGAN UNIV MED SCI                             | 2 |
| HOSP BOLZANO                                       | 2 |
| HOSP CLIN SAN CARLOS IDISSC                        | 2 |
| HOSP REFERENCIA LA EQUINA                          | 2 |
| HOSP UNIV RAMON CAJAL                              | 2 |
| HOSP WUHAN SPORTS UNIV                             | 2 |
| HUASHAN HOSP                                       | 2 |
| INDIANA UNIV SCH MED NW                            | 2 |
| INGENERON INC                                      | 2 |
| INHA UNIV                                          | 2 |
| INSERM U1156                                       | 2 |
| INST PASTEUR                                       | 2 |
| INST SPORT EXERCISE HLTH                           | 2 |
| INT INST TRANSLAT MED                              | 2 |
| IRCCS IST ORTOPED RIZZOLI                          | 2 |
| ISF COLL PHARM                                     | 2 |
| ISFAHAN UNIV MED SCI                               | 2 |
| ISFAHAN UNIV TECHNOL                               | 2 |
| IST ORTOPED GALEAZZI                               | 2 |
| IST ORTOPED RIZZOLI                                | 2 |
| IST ZOOPROFILATT SPERIMENTALE ABRUZZO MOLISE G     | 2 |
| JAPAN AGCY MED RES DEV                             | 2 |
| JAPAN RACING ASSOC                                 | 2 |
| JOHN COCHRAN VA MED CTR                            | 2 |
| KANAZAWA UNIV                                      | 2 |
| KANSAI MED UNIV                                    | 2 |
| KAOHSIUNG MED UNIV                                 | 2 |
| KAOHSIUNG MED UNIV HOSP                            | 2 |
| KAROLINSKA UNIV HOSP HUDDINGE                      | 2 |
| KEIO UNIV                                          | 2 |
| KEY LAB MUSCULOSKELETAL SYST DEGENERAT<br>REGENERA | 2 |
| KING ABDULAZIZ UNIV                                | 2 |
| KINGS COLL LONDON                                  | 2 |
| KOREA POLYTECH UNIV                                | 2 |
| KYOTO UNIV HOSP                                    | 2 |
| LEIDEN UNIV                                        | 2 |

|                                       |   |
|---------------------------------------|---|
| MAASTRICHT UNIV                       | 2 |
| MACQUARIE UNIV                        | 2 |
| MARIA SKLODOWSKA CURIE MEM CANC CTR   | 2 |
| MARSHALL UNIV                         | 2 |
| MAX PLANCK INST MOL GENET             | 2 |
| MED COLL GEORGIA                      | 2 |
| MED UNIV GRAZ                         | 2 |
| MED UNIV VIENNA                       | 2 |
| MERCK RES LABS                        | 2 |
| METU                                  | 2 |
| MIN SHENG GEN HOSP                    | 2 |
| MRC                                   | 2 |
| MT SINAI HLTH SYST                    | 2 |
| MUNICH UNIV APPL SCI                  | 2 |
| MYONGJI UNIV                          | 2 |
| N CAROLINA STATE UNIV                 | 2 |
| NANJING UNIV CHINESE MED              | 2 |
| NANTES UNIV                           | 2 |
| NATL DEF MED COLL                     | 2 |
| NATL HLTH RES INST                    | 2 |
| NATL UNIV SINGAPORE SUZHOU            | 2 |
| NEW JERSEY INST TECHNOL               | 2 |
| NIAMSD                                | 2 |
| NIST                                  | 2 |
| NOC NSF                               | 2 |
| NORFOLK NORWICH UNIV HOSP             | 2 |
| NOVARTIS INST BIOMED RES              | 2 |
| OKLAHOMA STATE UNIV                   | 2 |
| OLD DOMINION UNIV                     | 2 |
| OLVG WEST                             | 2 |
| ONZE LIEVE VROUW HOSP                 | 2 |
| ORTHOPADIE VIKTUALIENMARKT            | 2 |
| OSAKA PREFECTURE UNIV                 | 2 |
| OSPED SAN GIOVANNI DIO RUGGI DARAGONA | 2 |
| OTTAWA HOSP                           | 2 |
| OTTO VON GUERICKE UNIV                | 2 |
| PAIN MANAGEMENT CTR AMER              | 2 |
| PARCO TECNOL PADANO                   | 2 |
| PEKING UNION MED COLL                 | 2 |
| PEOPLES LIBERAT ARMY GEN HOSP         | 2 |
| PFERDEKLINK KIRCHHEIM                 | 2 |
| PINGHU SECOND PEOPLES HOSP            | 2 |
| POHANG UNIV SCI TECHNOL POSTECH       | 2 |
| RAMBAM MED CTR                        | 2 |
| REGENEXX LLC                          | 2 |

|                                      |   |
|--------------------------------------|---|
| ROYAL FREE LONDON NHS FDN TRUST HOSP | 2 |
| ROYAL LONDON HOSP                    | 2 |
| ROYAL ORTHOPAED HOSP                 | 2 |
| RUHR UNIV BOCHUM                     | 2 |
| S CHINA UNIV TECHNOL                 | 2 |
| SAARLAND UNIV                        | 2 |
| SALZBURG UNIV                        | 2 |
| SEMMELWEIS UNIV                      | 2 |
| SHAANXI PROV PEOPLES HOSP            | 2 |
| SHANGHAI MED UNIV 2                  | 2 |
| SHAOXING PEOPLES HOSP                | 2 |
| SHENYANG MIL AREA COMMAND            | 2 |
| SHENZHEN PEOPLES HOSP                | 2 |
| SHENZHEN UNIV                        | 2 |
| SHIRAZ UNIV MED SCI                  | 2 |
| SICHUAN COLL TRADIT CHINESE MED      | 2 |
| SOUTH CHINA UNIV TECHNOL             | 2 |
| SOUTHWEST HOSP                       | 2 |
| SPIRITO SANTO HOSP                   | 2 |
| ST LOUIS UNIV                        | 2 |
| ST VINCENT SHOULDER SPORTS CLIN      | 2 |
| STANFORD HLTH CARE                   | 2 |
| STEMS MED CLIN                       | 2 |
| SUNY BUFFALO                         | 2 |
| SURG ENERGET INC                     | 2 |
| SWISS STEM CELL FDN                  | 2 |
| TAMPERE UNIV HOSP                    | 2 |
| TANGSHAN WORKERS HOSP                | 2 |
| TECNOL MONTERREY                     | 2 |
| TIANJIN HOSP                         | 2 |
| TOKYO DENT COLL                      | 2 |
| TOKYO WOMENS MED UNIV                | 2 |
| TOR VERGATA ROME UNIV                | 2 |
| TRAUMA CTR MURNAU                    | 2 |
| TUFTS UNIV NEW ENGLAND MED CTR       | 2 |
| UNIV APPL SCI TECHNIKUM WIEN         | 2 |
| UNIV ARIZONA                         | 2 |
| UNIV ATHENS                          | 2 |
| UNIV AUCKLAND                        | 2 |
| UNIV AUSTRAL CHILE                   | 2 |
| UNIV AUTONOMA MADRID                 | 2 |
| UNIV BARI                            | 2 |
| UNIV BASEL                           | 2 |
| UNIV BASQUE COUNTRY                  | 2 |
| UNIV BELGRADE                        | 2 |

|                                           |   |
|-------------------------------------------|---|
| UNIV BRITISH COLUMBIA                     | 2 |
| UNIV CALDAS                               | 2 |
| UNIV COLL LONDON HOSP                     | 2 |
| UNIV E ANGLIA                             | 2 |
| UNIV EAST ANGLIA                          | 2 |
| UNIV ERLANGEN NURNBERG                    | 2 |
| UNIV FED ABC UFABC                        | 2 |
| UNIV FED FLUMINENSE                       | 2 |
| UNIV FLORENCE                             | 2 |
| UNIV GRONINGEN                            | 2 |
| UNIV HEIDELBERG                           | 2 |
| UNIV HELSINKI                             | 2 |
| UNIV HOSP BALGRIST                        | 2 |
| UNIV HOSP SALZBURG                        | 2 |
| UNIV HOSP ZURICH                          | 2 |
| UNIV HOUSTON                              | 2 |
| UNIV IOANNINA                             | 2 |
| UNIV JIMEI                                | 2 |
| UNIV KEBANGSAAN MALAYSIA                  | 2 |
| UNIV KLINIKUM HEIDELBERG                  | 2 |
| UNIV LAUSANNE HOSP                        | 2 |
| UNIV LIMERICK                             | 2 |
| UNIV LONDON IMPERIAL COLL SCI TECHNOL MED | 2 |
| UNIV LORRAINE                             | 2 |
| UNIV MALAGA                               | 2 |
| UNIV MANITOBA                             | 2 |
| UNIV MED CTR                              | 2 |
| UNIV MELBOURNE                            | 2 |
| UNIV MILANO BICOCCA                       | 2 |
| UNIV MUNSTER                              | 2 |
| UNIV NANTES                               | 2 |
| UNIV NEBRASKA LINCOLN                     | 2 |
| UNIV NEW SOUTH WALES                      | 2 |
| UNIV NICE SOPHIA ANTIPOLIS                | 2 |
| UNIV PACIFIC                              | 2 |
| UNIV PARIS 13                             | 2 |
| UNIV SAARLAND                             | 2 |
| UNIV SCI                                  | 2 |
| UNIV SCI TECHNOL CHINA                    | 2 |
| UNIV SOUTHAMPTON                          | 2 |
| UNIV STRASBOURG                           | 2 |
| UNIV TABRIZ                               | 2 |
| UNIV TAMPERE                              | 2 |
| UNIV TECHNOL COMPIEGNE                    | 2 |
| UNIV TEHRAN                               | 2 |



|                                        |   |
|----------------------------------------|---|
| UNIV TEXAS                             | 2 |
| UNIV TEXAS HLTH SCI CTR SAN ANTONIO    | 2 |
| UNIV TEXAS HOUSTON                     | 2 |
| UNIV TEXAS SOUTHWESTERN MED CTR DALLAS | 2 |
| UNIV VALENCIA                          | 2 |
| UNIV VERMONT                           | 2 |
| UNIV VET MED VIENNA                    | 2 |
| UNIV VIENNA                            | 2 |
| URMIA UNIV MED SCI                     | 2 |
| VA GREATER LOS ANGELES HEALTHCARE SYST | 2 |
| VIRGINIA COMMONWEALTH UNIV             | 2 |
| WAKE FOREST SCH MED                    | 2 |
| WAKE FOREST UNIV                       | 2 |
| WENZHOU MED COLL                       | 2 |
| WESTERN MICHIGAN UNIV                  | 2 |
| WONKWANG UNIV                          | 2 |
| WRITTLE AGR COLL                       | 2 |
| WROCLAW UNIV TECHNOL                   | 2 |
| WYETH DISCOVERY RES                    | 2 |
| XIAMEN UNIV                            | 2 |
| YALE UNIV                              | 2 |
| YANGZHOU UNIV                          | 2 |
| ZHENGZHOU UNIV                         | 2 |
| 1ST MIL CLIN HOSP                      | 1 |
| 3D BIOPRINTING SOLUT                   | 1 |
| 513 HOSP PLA                           | 1 |
| AALBORG UNIV                           | 1 |
| AARHUS UNIV                            | 1 |
| AARHUS UNIV HOSP                       | 1 |
| AB MED                                 | 1 |
| AB MED SPA                             | 1 |
| ACAD ATHENS                            | 1 |
| ACAD CTR DENT AMSTERDAM                | 1 |
| ACAD MED CTR                           | 1 |
| ACAD ORTHOPAED                         | 1 |
| ACAD ORTHOPAED GUANGDONG PROV          | 1 |
| ACAD ORTHOPED                          | 1 |
| ACAD SCI CZECH REPUBLIC                | 1 |
| ACAD SINICA                            | 1 |
| ACADEMIA                               | 1 |
| ADDENBROOKES HOSP                      | 1 |
| ADNAN MENDERES UNIV                    | 1 |
| ADV BIOTECHNOL INC                     | 1 |
| ADV SPINE PK AVE                       | 1 |
| ADVOCATE ILLINOIS MASONIC MED CTR      | 1 |

|                                  |   |
|----------------------------------|---|
| AFFILIATED HOSP CHENGDE MED COLL | 1 |
| AFFILIATED HOSP HUBEI PROV GOVT  | 1 |
| AFFILIATED HOSP LUZHOU           | 1 |
| AHVAZ JUNDISHAPUR UNIV MED SCI   | 1 |
| AICHI MED UNIV                   | 1 |
| AIR FORCE GEN HOSP               | 1 |
| AIZAWA HOSP                      | 1 |
| AJA UNIV MED SCI                 | 1 |
| ALAMO PINTADO EQUINE MED CTR     | 1 |
| ALEXANDRA HOSP                   | 1 |
| ALL INDIA INST MED SCI           | 1 |
| ALTA ORTHOPAED                   | 1 |
| AMBO UNIV                        | 1 |
| AMER BRITISH COWDRAY MED CTR     | 1 |
| AMER ORTHOPAED SOC SPORTS MED    | 1 |
| AMER UNIV BEIRUT                 | 1 |
| AMIL UNITEDHLTH GRP              | 1 |
| AMRITA INST MED SCI              | 1 |
| AMRITA VISHWA VIDYAPEETHAM       | 1 |
| AMSTERDAM MED CTR                | 1 |
| AN NAJAH NATL UNIV HOSP          | 1 |
| ANAHUAC UNIV                     | 1 |
| ANDREWS INST                     | 1 |
| ANIKA THERAPEUT INC              | 1 |
| ANKARA YILDIRIM BEYAZIT UNIV     | 1 |
| AO CITTA SALUTE SCI TORINO       | 1 |
| AO FDN                           | 1 |
| AO RES INST                      | 1 |
| AO RES INST DAVOS                | 1 |
| AOU FEDERICO II NAPLES           | 1 |
| ARAGON HLTH SCI INST             | 1 |
| ARIZONA STATE UNIV               | 1 |
| ARMY MIL MED UNIV                | 1 |
| ARTHREX                          | 1 |
| ARTS METIERS PARISTECH           | 1 |
| ASAHIKAWA MED UNIV               | 1 |
| ASAN MED CTR                     | 1 |
| ASIA UNIV HOSP                   | 1 |
| ASKLEPIOS KLIN ST GEORG          | 1 |
| ASKLEPIOS STADTKLIN              | 1 |
| ASL VARESE                       | 1 |
| ASOCIAC INVEST IND TEXT AITEX    | 1 |
| ASSOCIATE PT GOVT LAB            | 1 |
| ASST GAETANO PINI                | 1 |
| ATATURK TRAINING RES HOSP        | 1 |

|                                                   |   |
|---------------------------------------------------|---|
| ATHENA BIOMED INNOVAT                             | 1 |
| ATOS CLIN MUNICH                                  | 1 |
| ATTIKON ANIM HOSP                                 | 1 |
| ATTIKON UNIV GEN HOSP                             | 1 |
| ATTIKON UNIV HOSP                                 | 1 |
| AUCKLAND CITY HOSP                                | 1 |
| AUDRAIN MED CTR                                   | 1 |
| AUKAMM CLIN                                       | 1 |
| AUSTRALIA PERTH BONE TISSUE BANK                  | 1 |
| AUSTRALIAN RES COUNCIL                            | 1 |
| AUSTRALIAN RES COUNCIL TRAINING CTR INNOVAT       | 1 |
| BIOEN                                             | 1 |
| AUSTRIAN CLUSTER TISSUE ENGN                      | 1 |
| AUVA RES CTR                                      | 1 |
| AUVA TRAUMA CTR VIENNA MEIDLING                   | 1 |
| AVICENNA RES INST                                 | 1 |
| AZIENDA OSPED                                     | 1 |
| AZIENDA OSPED MAGGIORE CARITA                     | 1 |
| AZIENDA SOCIO SANIT TERR CTR SPECIALIST ORTOPED T | 1 |
| AZIENDA SOCIO SANITARIA TERR                      | 1 |
| BAGCILAR TRAINING RES HOSP                        | 1 |
| BALTIMORE VA MED CTR                              | 1 |
| BARCELONA UNIV                                    | 1 |
| BARTHOLOMEWS ROYAL LONDON HOSP                    | 1 |
| BARTS HLTH NHS TRUST                              | 1 |
| BARTS LONDON HOSP                                 | 1 |
| BARTS LONDON NHS TRUST                            | 1 |
| BARTS LONDON QUEEN MARYS SCH MED DENT             | 1 |
| BARUNSESANG HOSP                                  | 1 |
| BAYLOR SCOTT WHITE TEXAS SPINE JOINT HOSP         | 1 |
| BEAUMONT HLTH                                     | 1 |
| BEAUMONT HLTH SYST                                | 1 |
| BEIGANG HOSP                                      | 1 |
| BEIJING HOSP                                      | 1 |
| BEIJING SPORT UNIV                                | 1 |
| BEIJING UNIV CHEM TECHNOL                         | 1 |
| BERLIN BRANDENBURG CTR REGENERAT THERAPIES        | 1 |
| BERUFGGENOSSENSCHAFTLICHE UNIV KLIN               | 1 |
| BERGMANN SHEIL                                    | 1 |
| BETA KLIN                                         | 1 |
| BEZMIALEM VAKIF UNIV                              | 1 |
| BINZHOU PEOPLES HOSP                              | 1 |
| BIOACT SURG INC                                   | 1 |
| BIOCANT BIOTECHNOL INNOVAT CTR                    | 1 |
| BIOENGN PROGRAM                                   | 1 |

|                                                      |   |
|------------------------------------------------------|---|
| BIOMAT NANOMED CIBER BBN                             | 1 |
| BIOMED CTR                                           | 1 |
| BIOMEDICUM HELSINKI                                  | 1 |
| BIOMET                                               | 1 |
| BIOMIMET THERAPEUT INC                               | 1 |
| BIOSCAFFOLD INT PTE LTD                              | 1 |
| BIOTECHNOL INST IMASD                                | 1 |
| BIOTECHNOL INST MAS D 1                              | 1 |
| BIOVALDA HLTH TECHNOL INC                            | 1 |
| BK21 PLUS FUTURE BIOPHARMACEUT HUMAN RESOURCES<br>TR | 1 |
| BOCA RATON REG HOSP                                  | 1 |
| BONUS BIOGRP LTD                                     | 1 |
| BOSTON SPORTS SHOULDER CTR                           | 1 |
| BRAGA GUIMARAES                                      | 1 |
| BRAUNSCHWEIG UNIV TECHNOL                            | 1 |
| BRNO UNIV TECHNOL                                    | 1 |
| BROAD INST HARVARD MIT                               | 1 |
| BROOKHAVEN NATL LAB                                  | 1 |
| BROOMFIELD HOSP                                      | 1 |
| BRUCE W CARTER VET AFFAIRS MED CTR                   | 1 |
| BTI BIOTECHNOL INST                                  | 1 |
| BTI BIOTECHNOL INST IMASD                            | 1 |
| BUDAPEST UNIV TECHNOL ECON                           | 1 |
| BUKKYO UNIV                                          | 1 |
| BULGARIAN ACAD SCI                                   | 1 |
| BULINGTON EMERGENCY VET SPECIALISTS                  | 1 |
| BUNDANG JAESAENG HOSP                                | 1 |
| BURNHAM INST                                         | 1 |
| BUTANTAN INST                                        | 1 |
| C WAYNE MCILWRAITH TRANSLAT MED INST                 | 1 |
| CABA                                                 | 1 |
| CACTUS HEALTHCARE                                    | 1 |
| CAIRO UNIV                                           | 1 |
| CALIF INST BIOMED RES                                | 1 |
| CALIF STATE UNIV SACRAMENTO                          | 1 |
| CAMBRIDGE UNIV HOSP NHS FDN TRUST                    | 1 |
| CAMPUS BIOMED UNIV ROME                              | 1 |
| CANADIAN BLOOD SERV                                  | 1 |
| CANC RES UK                                          | 1 |
| CANGZHOU INTEGRATED TRADIT CHINESE WESTERN MED       | 1 |
| CAPPAGH NATL ORTHOPAED HOSP                          | 1 |
| CARDENAL HERRERA CEU UNIV                            | 1 |
| CARDIOENERGETICS                                     | 1 |
| CARDIOENERGETICS INC                                 | 1 |

|                                                    |   |
|----------------------------------------------------|---|
| CARE OF CAMIRE L                                   | 1 |
| CARITAS KRANKENHAUS BAD MERGENTHEIM                | 1 |
| CARLO POMA HOSP                                    | 1 |
| CARMEL HOSP                                        | 1 |
| CARNEGIE INST SCI                                  | 1 |
| CAROLINA MED CTR                                   | 1 |
| CAROLINAS MED CTR                                  | 1 |
| CASE WESTERN RESERVE UNIV HOSP                     | 1 |
| CAVE CREEK EQUINE SURG IMAGING CTR                 | 1 |
| CELAVIE BIOSCI LLC                                 | 1 |
| CELL ENGN ORIGIN                                   | 1 |
| CELLCOTEC                                          | 1 |
| CELLUMED CO LTD                                    | 1 |
| CENT TAIWAN UNIV SCI TECHNOL                       | 1 |
| CEU UNIV                                           | 1 |
| CHA BIO DIOSTECH CO LTD                            | 1 |
| CHANG GUNG UNIV MED COLL                           | 1 |
| CHANG GUNG UNIV SCI TECHNOL                        | 1 |
| CHANGCHUN UNIV CHINESE MED                         | 1 |
| CHANGPING DIST HOSP                                | 1 |
| CHANGZHI MED COLL                                  | 1 |
| CHAPEL ALLERTON HOSP                               | 1 |
| CHARING CROSS WESTMINSTER MED SCH                  | 1 |
| CHARLES STURT UNIV                                 | 1 |
| CHARLES UNIV PRAGUE                                | 1 |
| CHENGDU MIL GEN HOSP                               | 1 |
| CHENGDU UNIV TRADIT CHINESE MED                    | 1 |
| CHIBA UNIV                                         | 1 |
| CHIBA UNIV HOSP                                    | 1 |
| CHILDRENS HOSP BAMBINO GESU                        | 1 |
| CHILDRENS HOSP RES FDN                             | 1 |
| CHILDRENS MEM HOSP                                 | 1 |
| CHILDRENS UNIV HOSP                                | 1 |
| CHINA ASTRONAUT RES TRAINING CTR                   | 1 |
| CHINA ORTHOPED REGENERAT MED CORMED                | 1 |
| CHINA PEOPLES LIBERAT ARMY                         | 1 |
| CHINA REGENERAT MED CORMED                         | 1 |
| CHINA THREE GORGES UNIV                            | 1 |
| CHINESE MED ASSOC                                  | 1 |
| CHINESE MED UNIV                                   | 1 |
| CHIRURG TIERKLIN                                   | 1 |
| CHON BUK NATL UNIV                                 | 1 |
| CHONGQING ENGN RES CTR MICRONANO BIOMED MAT<br>DEV | 1 |
| CHONGQING KEY LAB ORAL DIS BIOMED SCI              | 1 |

|                                                 |   |
|-------------------------------------------------|---|
| CHONGQING KEY LAB ULTRASOUND MOL IMAGING        | 1 |
| CHONGQING NORMAL UNIV                           | 1 |
| CHONGQING UNIV MED SCI                          | 1 |
| CHRYSALIS BIOTECHNOL INC                        | 1 |
| CHU                                             | 1 |
| CHU NANCY BRABOIS                               | 1 |
| CHUNG HWA UNIV                                  | 1 |
| CHUNG SHAN MED UNIV HOSP                        | 1 |
| CHUNGNAM NATL UNIV                              | 1 |
| CHURCHILL HOSP                                  | 1 |
| CHUV                                            | 1 |
| CINCINNATI CHILDRENS HOSP MED CTR               | 1 |
| CINCINNATI CHILDRENS HOSP RES FDN               | 1 |
| CITY HOPE NATL MED CTR                          | 1 |
| CLIN CREU BLANCA                                | 1 |
| CLIN HORSES                                     | 1 |
| CLIN ORTHOPAED EMERGENCY SURG                   | 1 |
| CLIN RADIOL OKLAHOMA                            | 1 |
| CLIN SPORT PARIS V                              | 1 |
| CLIN VET EQUINE PRACTICE                        | 1 |
| CMU                                             | 1 |
| CNIC                                            | 1 |
| CNRS UMR 7622                                   | 1 |
| CNRS UMR 8104                                   | 1 |
| COL MICHAEL J CRESCENZ VET ADM MED CTR          | 1 |
| COLL MED                                        | 1 |
| COLUMBUS CLIN                                   | 1 |
| COMENIUS UNIV                                   | 1 |
| COMPLEJO HOSP UNIV CANARIAS                     | 1 |
| COMPREHENS PAIN MANAGEMENT CTR                  | 1 |
| CONSELL CATALA ESPORT                           | 1 |
| CONSORZIO RIC SANIT CORIS                       | 1 |
| CONSORZIO RIC SANITARIA CORIS                   | 1 |
| CONSTRUCT ORTHOPED RES EDUC FDN                 | 1 |
| CORPORAL MICHAEL J CRESCENZ VA MED CTR          | 1 |
| CORPORAL MICHAEL J CRESCENZ VET AFFAIRS MED CTR | 1 |
| CREAT BIOMOL INC                                | 1 |
| CREST JAPAN AGCY MED RES DEV                    | 1 |
| CRRL                                            | 1 |
| CSIC                                            | 1 |
| CSIRO                                           | 1 |
| CTO HOSP                                        | 1 |
| CTR ATUALIZACAO SAUDE                           | 1 |
| CTR CELLULAR MOL ENGN                           | 1 |
| CTR CHIRURG ORTHOPED SPORT                      | 1 |

|                                                 |   |
|-------------------------------------------------|---|
| CTR EXCELLENCE BIOINFORMAT LIFE SCI             | 1 |
| CTR EXPT RHEUMATOL                              | 1 |
| CTR HOSP POVOA VARZIM                           | 1 |
| CTR HOSP UNIV NANTES                            | 1 |
| CTR INVEST BIOMED RED BIOINGN BIOMAT NANOMED CI | 1 |
| CTR INVEST PRINCIPE FELIPE                      | 1 |
| CTR MED TEKNON                                  | 1 |
| CTR MICROBIROBOT SSSA                           | 1 |
| CTR MOL ORTHOPAED                               | 1 |
| CTR PAIN MANAGEMENT                             | 1 |
| CTR REGENERAT MED STEM CELL RES MFG LIVMEDCEL   | 1 |
| CTR TRANSLAT BONE JOINT SOFT TISSUE RES         | 1 |
| CTR TRAUMA                                      | 1 |
| CTR UNIV CELSO LISBOA                           | 1 |
| CTR UNIV ICESP                                  | 1 |
| CURTIN UNIV TECHNOL                             | 1 |
| CZECH TECH UNIV                                 | 1 |
| DALHOUSIE UNIV                                  | 1 |
| DALIAN UNIV                                     | 1 |
| DALIAN UNIV TECHNOL                             | 1 |
| DANA FARBER CANC INST                           | 1 |
| DEF MED REHABIL CTR                             | 1 |
| DELEGAC CATALUNA                                | 1 |
| DEMOCRITUS UNIV THRACE                          | 1 |
| DEPT ANESTHESIOLOGICAL                          | 1 |
| DEPT BIOENGN                                    | 1 |
| DEPT BIOMED ENGN                                | 1 |
| DEPT CIVIL ENGN                                 | 1 |
| DEPT INTERNAL MED RHEUMATOL                     | 1 |
| DEPT LAB MED PATHOL                             | 1 |
| DEPT MED MICROBIOL ID                           | 1 |
| DEPT MUSCULOSKELETAL DISORDERS                  | 1 |
| DEPT NANOENGN                                   | 1 |
| DEPT NEURAL PAIN SCI                            | 1 |
| DEPT ORTHOPAED SURG                             | 1 |
| DEPT ORTHOPAED TRAUMATOL                        | 1 |
| DEPT ORTHOPED                                   | 1 |
| DEPT ORTHOPED SURG                              | 1 |
| DEPT VET SCI ANIM HLTH PROD FOOD SAFETY         | 1 |
| DEPUY ORTHOPAED INC                             | 1 |
| DIPRECA HOSP                                    | 1 |
| DIV 01 SW RES INST                              | 1 |
| DIV PLAST RECONSTRUCT SURG                      | 1 |
| DOKUZ EYLUL UNIV                                | 1 |

|                                                    |   |
|----------------------------------------------------|---|
| DONALD BARBARA ZUCKER SCH MED HOFSTRA<br>NORTHWELL | 1 |
| DONCASTER ROYAL INFIRM                             | 1 |
| DONGGUAN INST FOOD DRUG CONTROL                    | 1 |
| DONGYING CITY PEOPLES HOSP                         | 1 |
| DR ALFEN ORTHOPAED SPINE CTR                       | 1 |
| DR ALFEN ORTHOPED SPINE CTR                        | 1 |
| DR ATTAMAN PLLC                                    | 1 |
| DR BLAZEKS DIST HOSP                               | 1 |
| DR CHASBULLAH ABDULMADJID GEN HOSP                 | 1 |
| DR MOSHIRI VET CLIN                                | 1 |
| DR SOERADJI TIRTONEGORO GEN HOSP                   | 1 |
| DR SOETOMO GEN HOSP                                | 1 |
| DRK BLUTSPENDEDIENST BADEN WURTTEMBERG HESSEN      | 1 |
| DUKE NUS MED SCH                                   | 1 |
| DZHK GERMAN CTR CARDIOVASC RES                     | 1 |
| EAST COAST VET IMAGING INC                         | 1 |
| EASTERN VIRGINIA MED SCH                           | 1 |
| ECOLE NATL VET                                     | 1 |
| ECOLE NATL VET ALFORT                              | 1 |
| ECOLE POLYTECH                                     | 1 |
| EDITH COWAN UNIV                                   | 1 |
| EDUARDO ANITUA FDN BIOMED RES                      | 1 |
| EDWARD HINES JR VA HOSP                            | 1 |
| EHIME UNIV                                         | 1 |
| EIT WROCLAW RES CTR                                | 1 |
| ELISABETH BRUYERE HOSP                             | 1 |
| EMBODY                                             | 1 |
| EMORY ORTHOPAED SPINE CTR                          | 1 |
| EMORY ORTHOPAED SPORTS SPINE                       | 1 |
| ENCELL CO LTD                                      | 1 |
| ENGN TECHNOL CTR TISSUE ENGN XIAN                  | 1 |
| EQUI VET CLIN HORSES                               | 1 |
| EQUINE BREEDING STUD                               | 1 |
| EQUINE CLIN DE WATERMOLEN                          | 1 |
| EQUINE CLIN MUHLEN                                 | 1 |
| EQUINE DIAGNOST CTR                                | 1 |
| EQUINE HOSP                                        | 1 |
| EQUINE VET PRATICE DR SULS                         | 1 |
| EQUITOM EQUINE HOSP                                | 1 |
| ERCIYES UNIV                                       | 1 |
| ESA                                                | 1 |
| ESCUELA TECN SUPER INGN IND UNED                   | 1 |
| ETHRIS GMBH                                        | 1 |
| EUROPEAN COMMISS                                   | 1 |



|                                                |   |
|------------------------------------------------|---|
| EUROPEAN INST EXCELLENCE TISSUE ENGN REGENERAT | 1 |
| EUROPEAN UNIV CYPRUS                           | 1 |
| EXPT ZOOPROFILACT INST SICILY A MIRRI          | 1 |
| FAC HLTH MED NURSING BEHAV SCI                 | 1 |
| FAC HOSP BRNO                                  | 1 |
| FAC MED UNIV                                   | 1 |
| FAC VET                                        | 1 |
| FACTORSTEM LTD                                 | 1 |
| FDN AVANTEA                                    | 1 |
| FDN CARDIOCTR TICINO                           | 1 |
| FDN EDUARDO ANITUA                             | 1 |
| FDN GARCIA CUGAT                               | 1 |
| FDN JIMENEZ DIAZ                               | 1 |
| FDN POLIAMBULANZA                              | 1 |
| FDN POLIAMBULANZA IST OSPEDALIERO              | 1 |
| FDN RES TECHNOL HELLAS                         | 1 |
| FDN RIMED                                      | 1 |
| FDN STEM CELL RES                              | 1 |
| FED UNIV PAMPA                                 | 1 |
| FED UNIV SAO CARLOS UFSCAR                     | 1 |
| FED UNIV SAO PAULO UNIFESP                     | 1 |
| FETHARD EQUINE HOSP                            | 1 |
| FIDIA ADV BIOPOLYMERS                          | 1 |
| FIDIA FARMACEUT SPA                            | 1 |
| FIOCRUZ MINAS                                  | 1 |
| FIRST MIL MED UNIV                             | 1 |
| FIRST PEOPLES HOSP GUANGYUAN                   | 1 |
| FIRST PEOPLES HOSP HUZHOU                      | 1 |
| FIRST PEOPLES HOSP LIANYUNGANG                 | 1 |
| FIRST PEOPLES HOSP YONGKANG                    | 1 |
| FLINDERS UNIV S AUSTRALIA                      | 1 |
| FLORIDA ORTHOPED FOOT ANKLE CTR                | 1 |
| FMU                                            | 1 |
| FOOTBALL CLUB BARCELONA                        | 1 |
| FOOYIN UNIV                                    | 1 |
| FORENS RES ANAL                                | 1 |
| FORSCHUNGSINST LEDER KUNSTSTOFFBAHNEN FILK     | 1 |
| FRAUNHOFER INST TOXICOL AEROSOL RES            | 1 |
| FREI UNIV BERLIN                               | 1 |
| FRIEDRICH ALEXANDER UNIV ERLANGEN NURNBERG     | 1 |
| FUJIAN PROV HOSP                               | 1 |
| FUKUSHIMA UNIV                                 | 1 |
| FUN JEN CATHOLIC UNIV                          | 1 |
| G DANNUNZIO FDN ITAB                           | 1 |
| GALEAZZI ORTHOPAED INST                        | 1 |

|                                             |   |
|---------------------------------------------|---|
| GALLANT PET INC                             | 1 |
| GEMMA PROTOTIPI                             | 1 |
| GEN HOSP CHINESE PEOPLES ARMED POLICE FORCE | 1 |
| GEN HOSP CHINESE PLA                        | 1 |
| GEN HOSP PLA                                | 1 |
| GENE CELL INC                               | 1 |
| GENESIS PAIN SPECIALIST                     | 1 |
| GENEVA UNIV HOSP                            | 1 |
| GENZYME TISSUE REPAIR INC                   | 1 |
| GEORGE WASHINGTON UNIV                      | 1 |
| GEORGIA INST TECH                           | 1 |
| GEORGIA REGENTS UNIV                        | 1 |
| GEORGIA TECH                                | 1 |
| GEORGIA TECH EMORY UNIV                     | 1 |
| GERMAN ARMED FORCES HOSP ULM                | 1 |
| GERMAN RED CROSS BLOOD DONAT SERV           | 1 |
| GERMAN RES CTR BIOTECHNOL GBF               | 1 |
| GERMAN SPORT UNIV COLOGNE                   | 1 |
| GESELL BIOTECHNOL FORSCH MBH                | 1 |
| GLASGOW CALEDONIAN UNIV                     | 1 |
| GLASGOW ORTHOPAED RES INITIAT GLORI         | 1 |
| GLOBAL STEM CELL TECHNOL                    | 1 |
| GLOBAL STEM CELL TECHNOL ANACURA GRP        | 1 |
| GOLD COAST UNIV HOSP                        | 1 |
| GOLDEN JUBILEE NATL HOSP                    | 1 |
| GOTHENBURG UNIV                             | 1 |
| GOVIND BALLABH PANT UNIV AGR TECHNOL        | 1 |
| GR CONSULTING INC                           | 1 |
| GRAZ UNIV TECHNOL                           | 1 |
| GREAT ORMOND ST HOSP SICK CHILDREN          | 1 |
| GREEN CROSS WELLBEING CORP                  | 1 |
| GREENVILLE HLTH SYST                        | 1 |
| GUANGZHOU COMMAND                           | 1 |
| GUANGZHOU MIL AREA WUHAN                    | 1 |
| GUANGZHOU MIL REG                           | 1 |
| GUANGZHOU UNIV TRADIT CHINESE MED           | 1 |
| GUIZHOU PROV PEOPLES HOSP                   | 1 |
| GUNMA UNIV                                  | 1 |
| GUYS ST THOMAS HOSP                         | 1 |
| GUYS ST THOMASS UNIV HOSP                   | 1 |
| GUYUAN PEOPLES HOSP                         | 1 |
| GWO XI STEM CELL APPL TECHNOL               | 1 |
| HADASSAH HEBREW UNIV MED CTR                | 1 |
| HADASSAH MED CTR                            | 1 |
| HAFFKINE INST                               | 1 |

|                                      |   |
|--------------------------------------|---|
| HAINAN PROV NONGKEN SANYA HOSP       | 1 |
| HAINAN UNIV                          | 1 |
| HANEUL ORTHOPED HOSP                 | 1 |
| HANGZHOU TCM HOSP                    | 1 |
| HANOVER MED SCH MHH                  | 1 |
| HARBIN CHILDREN HOSP                 | 1 |
| HARRISON INT PEACE HOSP              | 1 |
| HARVARD SCH DENT MED                 | 1 |
| HCPA                                 | 1 |
| HEALTHCARE TECHNOL INST              | 1 |
| HEBEI UNIV ENGN                      | 1 |
| HEILONGJIANG PROV ACAD MED SCI       | 1 |
| HEILONGJIANG PROV HOSP               | 1 |
| HELMHOLTZ ZENTRUM BERLIN MAT ENERGIE | 1 |
| HELSINKI UNIV HOSP                   | 1 |
| HERZ JESU KRANKENHAUS                | 1 |
| HESSING STIFTUNG                     | 1 |
| HESSING STIFTUNG AUGSBURG            | 1 |
| HICKORY VET HOSP                     | 1 |
| HINSDALE ORTHOPAED                   | 1 |
| HIRANANDANI HOSP                     | 1 |
| HIROSHIMA PREFECTURAL REHABIL CTR    | 1 |
| HLTH RES INST ARAGON IIS ARAGON      | 1 |
| HMT HIGH MED TECHNOL AG              | 1 |
| HOAG HOSP                            | 1 |
| HOFSTRA NORTHWELL HLTH               | 1 |
| HOKKAIDO UNIV HOSP                   | 1 |
| HOKUSHIN ORTHOPAED HOSP              | 1 |
| HONG KONG UNIV SCI TECHNOL           | 1 |
| HOP BICETRE                          | 1 |
| HOP HENRI MONDOR                     | 1 |
| HOP PAUL BROUSSE                     | 1 |
| HOP PRIVE LOUVIERE                   | 1 |
| HOP ST ELOI INM                      | 1 |
| HOP TROUSSEAU                        | 1 |
| HOP UNIV CROIX ROUSSE                | 1 |
| HOP XAVIER AMOZAN                    | 1 |
| HOSP BOAVISTA                        | 1 |
| HOSP CLIN MONTEVIDEO                 | 1 |
| HOSP CLIN SAN CARLOS                 | 1 |
| HOSP CLIN UNIV VIRGEN ARRIXACA       | 1 |
| HOSP COSTA DEL SOL                   | 1 |
| HOSP CRUCES                          | 1 |
| HOSP ERNST VON BERGMANN              | 1 |
| HOSP GEN UNIV GREGORIO MARANON       | 1 |

|                                       |   |
|---------------------------------------|---|
| HOSP GROSSHADERN                      | 1 |
| HOSP HENRI MONDOR                     | 1 |
| HOSP JUAN RAMON JIMENEZ               | 1 |
| HOSP LA PAZ                           | 1 |
| HOSP LUZHOU                           | 1 |
| HOSP MAE DEUS                         | 1 |
| HOSP MIL PEDRO V                      | 1 |
| HOSP PRIVADO BRAGA                    | 1 |
| HOSP QUIRON SALUD                     | 1 |
| HOSP SALERNO                          | 1 |
| HOSP SAO JOAO                         | 1 |
| HOSP SARAH SALVADOR                   | 1 |
| HOSP SICK CHILDREN                    | 1 |
| HOSP SPECIAL SURG FLORIDA             | 1 |
| HOSP SPECIAL SURG HSS                 | 1 |
| HOSP TORREJON                         | 1 |
| HOSP UNIV CLIN SAN CARLOS MADRID      | 1 |
| HOSP UNIV DONOSTIA                    | 1 |
| HOSP UNIV KEBANGSAAN MALAYSIA         | 1 |
| HOSP UNIV LA PAZ                      | 1 |
| HOSP UNIV LA PRINCESA                 | 1 |
| HOSP UNIV MARQUES DE VALDECILLA       | 1 |
| HOSP UNIV PENN                        | 1 |
| HOSP UNIV POLITECN LA FE              | 1 |
| HOSP UNIV RAMON Y CAJAL               | 1 |
| HOSP UNIV VIRGEN NIEVES               | 1 |
| HOSP VALLE DE HEBRON                  | 1 |
| HOSPITAL AUTHOR                       | 1 |
| HOWARD UNIV                           | 1 |
| HUBEI HANCHUAN PEOPLES HOSP           | 1 |
| HUBEI PROV KEY LAB DEV ORIGINATED DIS | 1 |
| HUMANITAS RES HOSP                    | 1 |
| HUMANITAS SAN PIO X                   | 1 |
| HUNAN NORMAL UNIV                     | 1 |
| HUNGARIAN ACAD SCI                    | 1 |
| HYOGO COLL MED                        | 1 |
| IBB                                   | 1 |
| IBPS DEV BIOL LAB                     | 1 |
| ICAN                                  | 1 |
| ICAR INDIAN VET RES INST              | 1 |
| ICOSS                                 | 1 |
| ICVS                                  | 1 |
| ICVS 3BS                              | 1 |
| ICVS 3BS PT ASSOCIATE LAB             | 1 |
| ICVS 3BSPT GOVT ASSOCIATE LAB         | 1 |

|                                                   |   |
|---------------------------------------------------|---|
| IDEXX LABS                                        | 1 |
| IFR                                               | 1 |
| IGEA SPA                                          | 1 |
| IGEA SPA CLIN BIOPHYS                             | 1 |
| IIT                                               | 1 |
| IM SECHENOV FIRST MOSCOW STATE MED UNIV           | 1 |
| IMAGINE INST                                      | 1 |
| IMPERIAL COLL LONDON                              | 1 |
| INCLIVA BIOMED RES INST                           | 1 |
| IND TECHNOL RES INST                              | 1 |
| INDIAN INST TECHNOL GUWAHATI                      | 1 |
| INDIAN VET RES INST                               | 1 |
| INDIAN VET RES INST IZATNAGAR                     | 1 |
| INDIANA UNIV SCH MED                              | 1 |
| INEFC                                             | 1 |
| INGENERON                                         | 1 |
| INGENERON GMBH                                    | 1 |
| INNOVHUB SSI                                      | 1 |
| INOVARION                                         | 1 |
| INSERM 1094                                       | 1 |
| INST APPAREIL LOCOMOTEUR NOLLET                   | 1 |
| INST BIOL CHEM                                    | 1 |
| INST BIOMED HLTH SCI                              | 1 |
| INST BIOTECHNOL                                   | 1 |
| INST BONE CARTILAGE                               | 1 |
| INST CALOT                                        | 1 |
| INST CHIRURG ORTHOPED SPORT ICOS 13               | 1 |
| INST COCHIN                                       | 1 |
| INST CUGAT                                        | 1 |
| INST ENGN MED                                     | 1 |
| INST ENT                                          | 1 |
| INST G CAPORALE                                   | 1 |
| INST INVEST BIOSANITARIA IBS                      | 1 |
| INST INVEST SANITARIA FDN JIMENEZ DIAZ            | 1 |
| INST INVEST SANITARIA HOSP CLIN SAN CARLOS IDISSC | 1 |
| INST LIFE SCI                                     | 1 |
| INST MOL CELL BIOL                                | 1 |
| INST MURCIANO INVEST DESARROLLO AGR ALIMENTAR     | 1 |
| INST MUSCULOSKELETAL ANAL RES THERAPY             | 1 |
| INST NACL CIENCIAS MED NUTR SALVADOR ZUBIRAN      | 1 |
| INST NACL REHABIL LUIS GUILLERMO IBARRA IBARRA    | 1 |
| INST ONCOL                                        | 1 |
| INST ORTHOPED                                     | 1 |
| INST PESQUISAS CELULAS TRONCO                     | 1 |
| INST RECH BIOMAT BIOTECHNOL                       | 1 |

|                                                 |   |
|-------------------------------------------------|---|
| INST REGENERAT MED                              | 1 |
| INST SCI TECHNOL CERAM                          | 1 |
| INST TECHNOL                                    | 1 |
| INST TECNOL ARAGON ITAINNOVA                    | 1 |
| INST TEXT TECHNOL PROC ENGN                     | 1 |
| INST TISSUE ENGN REGENERAT MED                  | 1 |
| INSTM                                           | 1 |
| INSTM NATL INTERUNIV CONSORTIUM MAT SCI TECHNOL | 1 |
| INT CONSULTANCY BLOOD COMPONENTS QUAL SAFETY    | 1 |
| IMPR                                            | 1 |
| INT MED UNIV                                    | 1 |
| INT NEUROSCI INST                               | 1 |
| INT OLYMP COMM MED COMMISS                      | 1 |
| INT SOC CELL THERAPY                            | 1 |
| INVERNO MONTELEONE                              | 1 |
| IRANIAN ACAD CTR EDUC CULTURE RES ACECR         | 1 |
| IRANIAN FOOD DRUG ADM                           | 1 |
| IRCCS INST ORTOPED RIZZOLI                      | 1 |
| IRCCS IST CLIN HUMANITAS                        | 1 |
| IRCCS ORTHOPED INST GALEAZZI                    | 1 |
| IRCCS RIZZOLI ORTHOPED INST                     | 1 |
| IRCCS SAN RAFFAELE PISANA                       | 1 |
| IRCCS SAN RAFFAELE SCI INST                     | 1 |
| IRRC GALEAZZI ORTHOPAED INST                    | 1 |
| ISAR KLINIKUM                                   | 1 |
| ISME                                            | 1 |
| ISOTIS NV                                       | 1 |
| IST ITALIAN TECNOL                              | 1 |
| IST ITALIANO TECNOL                             | 1 |
| IST NAZL STAT ISTAT                             | 1 |
| IST ORTOPED GALEAZZI IRCCS                      | 1 |
| IST OSPED                                       | 1 |
| IST SUPER SANITA                                | 1 |
| IST ZOOPROFILATT SPERIMENTALE ABRUZZO MOLISE GI | 1 |
| IST ZOOPROFILATT SPERIMENTALE LAZIO TOSCANA M A | 1 |
| IST ZOOPROFILATT SPERIMENTALE VENEZIE           | 1 |
| IST ZOOPROFILATTICO SPERIMENTALE ABRUZZO MOLISE | 1 |
| ISTANBUL TECH UNIV                              | 1 |
| IWAMIZAWA KOJIN KAI HOSP                        | 1 |
| IZMIR DEMOCRACY UNIV                            | 1 |
| IZSLER                                          | 1 |
| JACKSON LAB                                     | 1 |
| JAGIELLONIAN UNIV                               | 1 |
| JAPAN COMMUNITY HLTH CARE ORG                   | 1 |
| JAPAN LABOUR HLTH WELF ORG                      | 1 |

|                                                 |   |
|-------------------------------------------------|---|
| JAPAN SCI TECHNOL AGCY                          | 1 |
| JAPAN SCI TECHNOL CORP                          | 1 |
| JAPAN SELF DEF FORCE HOSP YOKOSUKA              | 1 |
| JAPAN SOC PROMOT SCI                            | 1 |
| JASLOK HOSP RES CTR                             | 1 |
| JERRY L PETTIS MEM VA MED CTR                   | 1 |
| JI NAN UNIV                                     | 1 |
| JIANGSU UNIV                                    | 1 |
| JICHI MED UNIV                                  | 1 |
| JILIN BIOMED POLYMERS ENGN LAB                  | 1 |
| JINAN CENT HOSP                                 | 1 |
| JINMEN 2 PEOPLES HOSP                           | 1 |
| JL PETTIS MEM VA MED CTR                        | 1 |
| JOHN RADCLIFFE HOSP                             | 1 |
| JOHNS HOPKINS SCH MED                           | 1 |
| JONSSON ENGN CTR                                | 1 |
| JORDAN UNIV SCI TECHNOL                         | 1 |
| JULIUS MAXIMILIANS UNIV                         | 1 |
| KAGOSHIMA UNIV                                  | 1 |
| KAISER PERMANENTE                               | 1 |
| KAISER PERMANENTE SAN DIEGO                     | 1 |
| KANTONSSPITAL WINTERTHUR                        | 1 |
| KAPLAN HOSP                                     | 1 |
| KAPODISTRIAN UNIV ATHENS                        | 1 |
| KAROL MARCINKOWSKI MED UNIV                     | 1 |
| KASETSART UNIV                                  | 1 |
| KATHOLIEKE UNIV LEUVEN                          | 1 |
| KAVLI INST BIONANO SCI TECHNOL                  | 1 |
| KAYAL ORTHOPAED CTR                             | 1 |
| KAZAN FED UNIV                                  | 1 |
| KECK SCH MED USC                                | 1 |
| KEMILEW STEM CELLS ANIM CO                      | 1 |
| KERRY REHABIL MED RES INST                      | 1 |
| KEY LAB TISSUE ENGN REGENERAT MED ZHEJIANG PROV | 1 |
| KHALSA COLL VET SCI                             | 1 |
| KHARAZMEI UNIV                                  | 1 |
| KING ABDULAZIZ UNIV HOSP                        | 1 |
| KING SAUD UNIV                                  | 1 |
| KINGSTON HOSP NHS TRUST                         | 1 |
| KINKI UNIV                                      | 1 |
| KIRCHHEIM ALTANO GMBH                           | 1 |
| KLINIKUM BOGENHAUSEN                            | 1 |
| KLINIKUM INGOLSTADT                             | 1 |
| KLINIKUM LANDSBERG LECH                         | 1 |
| KOBE KAISEI HOSP                                | 1 |

|                                                 |   |
|-------------------------------------------------|---|
| KOBE ROSAI HOSP                                 | 1 |
| KOC UNIV HOSP                                   | 1 |
| KOCAELI UNIV                                    | 1 |
| KOCHI UNIV                                      | 1 |
| KOGAKUIN UNIV                                   | 1 |
| KOLLING INST MED RES                            | 1 |
| KOREA BASIC SCI INST                            | 1 |
| KOREA INST SCI TECHNOL KIST                     | 1 |
| KOREA RES INST CHEM TECHNOL                     | 1 |
| KOREA UNIV SCI TECHNOL UST                      | 1 |
| KU MED CTR                                      | 1 |
| KUMAMOTO UNIV HOSP                              | 1 |
| KYOWA HAKKO KIRIN                               | 1 |
| KYOWA HAKKO KIRIN KOREA                         | 1 |
| KYUNGPOOK NATL UNIV HOSP                        | 1 |
| KYUSHU UNIV                                     | 1 |
| LA TOUR HOSP                                    | 1 |
| LABEO FRANK DUNCOMBE                            | 1 |
| LAM BIOTECHNOL SA                               | 1 |
| LANKENAU INST MED RES                           | 1 |
| LANZHOU MIL COMMAND REG                         | 1 |
| LE REVE REGENERAT WELLNESS                      | 1 |
| LEEDS DENT INST                                 | 1 |
| LEHIGH VALLEY HLTH NETWORK                      | 1 |
| LEIBNIZ INST POLYMERFORSCH DRESDEN EV IPF       | 1 |
| LENOX HILL HOSP                                 | 1 |
| LGI                                             | 1 |
| LI KA SHING CTR                                 | 1 |
| LIFEMAP SCI                                     | 1 |
| LIOAD                                           | 1 |
| LITHUANIAN UNIV HLTH SCI                        | 1 |
| LIV HOSP                                        | 1 |
| LOMA LINDA MED UNIV                             | 1 |
| LONG ISL JEWISH MED CTR                         | 1 |
| LONGGANG ENT HOSP                               | 1 |
| LOUIS STOKES CLEVELAND VET AFFAIRS MED CTR      | 1 |
| LOWER SAXONY CTR BIOMED ENGN IMPLANT RES DEV NI | 1 |
| LOZANO BLESIA UNIV CLIN HOSP                    | 1 |
| LSU HLTH SCI CTR                                | 1 |
| LSU SCH MED                                     | 1 |
| LUDWIG MAXIMILIAN UNIV MUNICH                   | 1 |
| LUDWIG MAXIMILIANS UNIV LMU                     | 1 |
| LUOHE MED COLL                                  | 1 |
| LUZERNER KANTONSSPITAL                          | 1 |
| MACAU UNIV SCI TECHNOL                          | 1 |



|                                           |   |
|-------------------------------------------|---|
| MACKAY MEM HOSP                           | 1 |
| MAHIDOL UNIV                              | 1 |
| MAIMONIDES HOSP                           | 1 |
| MAIMONIDES INST BIOMED RES CORDOBA IMIBIC | 1 |
| MAINLAND ACUPUNCTURE CTR                  | 1 |
| MAINSTREAM CONSULTING                     | 1 |
| MANLY HOSP                                | 1 |
| MARIA SKLODOWSKA CURIE INST               | 1 |
| MARQUETTE UNIV                            | 1 |
| MAT SCI ENGN PROGRAM                      | 1 |
| MATER ADULT HOSP                          | 1 |
| MATER HLTH SERV                           | 1 |
| MATER MED RES INST                        | 1 |
| MATER RES INST UNIV QUEENSLAND            | 1 |
| MATERN CHILD CARE HOSP PINGSHAN DIST      | 1 |
| MAX BERGMANN CTR BIOMAT DRESDEN           | 1 |
| MAX BIEDERMANN INST BIOMECH               | 1 |
| MAX PLANCK INST COLLOIDS INTERFACES       | 1 |
| MAX PLANCK INST HEART LUNG RES            | 1 |
| MAX PLANCK INST MOL GENET MPI             | 1 |
| MAYO CLIN ROCHESTER                       | 1 |
| MCDAVITT VET CLIN                         | 1 |
| MCGOWAN INST REGENERAT MED                | 1 |
| MED SCH HANNOVER MHH                      | 1 |
| MED SPECTRUM TWENTE HOSP                  | 1 |
| MED SPORT 2000 SRL                        | 1 |
| MED UNIV INNSBRUCK                        | 1 |
| MED UNIV LUBECK                           | 1 |
| MED UNIV S CAROLINA                       | 1 |
| MED UNIV SOUTH CAROLINA                   | 1 |
| MED UNIV VARNA                            | 1 |
| MED UNIV WROCLAW                          | 1 |
| MEDIPOLE                                  | 1 |
| MEDSTAR GEORGETOWN UNIV HOSP              | 1 |
| MEDSTAR WASHINGTON HOSP                   | 1 |
| MEDWAY NHS FDN TRUST                      | 1 |
| MEIJI UNIV                                | 1 |
| MENLO SPORTS MED                          | 1 |
| MERLN INST TECHNOL INSPIRED REGENERAT MED | 1 |
| MESA INST NANOTECHNOL                     | 1 |
| MESENCHYMAL STEM CELL GRP                 | 1 |
| METU COE BIOMAT TISSUE ENGN               | 1 |
| METU CTR EXCELLENCE BIOMAT TISSUE ENGN    | 1 |
| MHH                                       | 1 |
| MICHIGAN STATE UNIV                       | 1 |

|                                                    |   |
|----------------------------------------------------|---|
| MID CTY ORTHOPAED SURG SPORTS MED                  | 1 |
| MIDDLE E TECH UNIV                                 | 1 |
| MIDDLE EAST TECH UNIV                              | 1 |
| MIDDLEMORE HOSP                                    | 1 |
| MIDWEST ORTHOPAED RUSH                             | 1 |
| MIL INST MED                                       | 1 |
| MIMEDX GRP INC                                     | 1 |
| MING CHI UNIV TECHNOL                              | 1 |
| MING MED SERV SDN BHD                              | 1 |
| MINIST EDUC                                        | 1 |
| MINIST HLTH RUSSIAN FEDERAT                        | 1 |
| MIRIAM HOSP                                        | 1 |
| MISSISSIPPI STATE UNIV                             | 1 |
| MISSOURI UNIV SCI TECHNOL                          | 1 |
| MIYAZAKI UNIV                                      | 1 |
| MONFARED NIAKI ARMY HOSP                           | 1 |
| MONTPELLIER UNIV HOSP                              | 1 |
| MOSCOW SECHENOV MED UNIV                           | 1 |
| MOSCOW STATE ACAD VET MED BIOTECHNOL               | 1 |
| MOUSE ANIM PATHOL LAB MAPLAB FONDAZIONE FILARET    | 1 |
| MT SINAI MED CTR                                   | 1 |
| MULTIDISCIPLINARY HOSP                             | 1 |
| MYOMICS INC                                        | 1 |
| MYONGJI HOSP                                       | 1 |
| MYRIAD GENET INC                                   | 1 |
| N SHORE UNIV HOSP LIJ                              | 1 |
| NAGOYA UNIV GRAD SCH MED                           | 1 |
| NALGAE HOSP                                        | 1 |
| NANFANG MED UNIV                                   | 1 |
| NANJING JINLING HOSP                               | 1 |
| NANJING NORMAL UNIV                                | 1 |
| NANKAI UNIV                                        | 1 |
| NANOTECHNOL REGENERAT MED COMMERCIALIZAT CTR<br>LT | 1 |
| NANTONG MATERNAL CHILD HLTH HOSP                   | 1 |
| NATIONWIDE CHILDRENS HOSP                          | 1 |
| NATL BLOOD SERV                                    | 1 |
| NATL CHUNG HSING UNIV                              | 1 |
| NATL CTR NEUROL PSYCHIAT                           | 1 |
| NATL CTR TISSUE CELL BANKING                       | 1 |
| NATL DEF MED CTR                                   | 1 |
| NATL DEFENSE MED COLL                              | 1 |
| NATL ENGN RES CTR NANOTECHNOL                      | 1 |
| NATL ENGN RES CTR TISSUE RESTORAT RECONSTRUCT      | 1 |
| NATL HOSP NORWAY                                   | 1 |

|                                                 |   |
|-------------------------------------------------|---|
| NATL HOSP ORG IOU NATL HOSP                     | 1 |
| NATL ILAN UNIV                                  | 1 |
| NATL INST BIOL STAND CONTROLS                   | 1 |
| NATL INST CHILD HLTH DEV                        | 1 |
| NATL INST DENTAL CRANIOFACIAL RES               | 1 |
| NATL INST GENET                                 | 1 |
| NATL KAPODISTRIAN UNIV ATHENS                   | 1 |
| NATL NAGASAKI CENT HOSP                         | 1 |
| NATL POLICE HOSP                                | 1 |
| NATL RES CTR REHABIL TECH AIDS                  | 1 |
| NATL SPORT ACAD VASIL LEVSKI                    | 1 |
| NATL TAIWAN UNIV COLL MED                       | 1 |
| NATL UNIV HLTH SYST                             | 1 |
| NATL UNIV IRELAND UNIV COLL GALWAY              | 1 |
| NAVAL GEN HOSP PLA                              | 1 |
| NAVAL MED RES CTR                               | 1 |
| NDORMS                                          | 1 |
| NEOTHERIX LTD                                   | 1 |
| NEUROSCI RES CTR LLC                            | 1 |
| NEW BOLTON CTR                                  | 1 |
| NEW ENGLAND BAPTIST HOSP                        | 1 |
| NEW JERSEY REGENERAT MED INST                   | 1 |
| NEW YORK GIANTS                                 | 1 |
| NEW YORK INST TECHNOL                           | 1 |
| NEW YORK PRESBYTERIAN HOSP                      | 1 |
| NEW YORK R D CTR TRANSLAT MED THERAPEUT INC     | 1 |
| NEWMARKET EQUINE HOSP                           | 1 |
| NIFE LOWER SAXONY CTR BIOMED ENGN IMPLANT RES D | 1 |
| NIHR BIOMED RES CTR                             | 1 |
| NIHR UNIV COLL LONDON HOSP                      | 1 |
| NIIGATA MEIKUN HIGH SCH                         | 1 |
| NIMH                                            | 1 |
| NINGBO 2 HOSP                                   | 1 |
| NIPPON MED COLL HOSP                            | 1 |
| NIT                                             | 1 |
| NORMANDIE UNIV                                  | 1 |
| NORTH CHINA UNIV SCI TECHNOL                    | 1 |
| NORTH SHORE HOSP                                | 1 |
| NORTH SHORE LIJ HLTH SYST                       | 1 |
| NORTH SICHUAN COLL MED                          | 1 |
| NORTHEASTERN UNIV                               | 1 |
| NORTHERN SYDNEY LOCAL HLTH DIST                 | 1 |
| NORTHSHORE UNIV HEALTHSYST                      | 1 |
| NORTHWELL HLTH                                  | 1 |
| NORTHWEST UNIV                                  | 1 |

|                                     |   |
|-------------------------------------|---|
| NORTHWEST UNIV XIAN                 | 1 |
| NORTHWESTERN POLYTECH UNIV          | 1 |
| NORWEGIAN SCH SPORT SCI             | 1 |
| NOVAGENIT SRL                       | 1 |
| NOVARTIS RES FDN                    | 1 |
| NPIMR                               | 1 |
| NPIMR Y3                            | 1 |
| NUFFIELD ORTHOPAED CTR              | 1 |
| NUMARES AG                          | 1 |
| NW ORTHOPAED INST                   | 1 |
| OCEAN UNIV CHINA                    | 1 |
| OCEANOG GRP PARQUES REUNIDOS        | 1 |
| ODENSE UNIV HOSP                    | 1 |
| OFZ ORTHOPAD FACHZENTRUM WEILHEIM   | 1 |
| OITA UNIV                           | 1 |
| OKINOSU HOSP                        | 1 |
| OLVG                                | 1 |
| OREGON EQUINE                       | 1 |
| ORGAN TECHNOL INC                   | 1 |
| ORGANOGENESIS                       | 1 |
| ORIENTAL BIO GRP                    | 1 |
| ORTHOPAED CTR OCON                  | 1 |
| ORTHOPAED HOSP GUANGDONG PROV       | 1 |
| ORTHOPAED HOSP RES CTR              | 1 |
| ORTHOPAED OBERLAND                  | 1 |
| ORTHOPAED RES LABS                  | 1 |
| ORTHOPAED SPECIALISTS OS            | 1 |
| ORTHOPAED SURG CTR OCC              | 1 |
| ORTHOPAED UNIV HOSP HEIDELBERG      | 1 |
| ORTHOPED UNIV HOSP                  | 1 |
| ORTHOSOUTH SURG CTR                 | 1 |
| ORTHOSPORTS                         | 1 |
| ORVIT CLIN                          | 1 |
| OSAKA CITY UNIV                     | 1 |
| OSAKIDETZA                          | 1 |
| OSSACUR AG                          | 1 |
| OTR3 CO                             | 1 |
| OTTAWA HOSP RES INST                | 1 |
| OU WB SCH MED                       | 1 |
| OUR LADY LOURDES HOSP               | 1 |
| OXFORD BIOMAT LTD                   | 1 |
| PAIN RELIEF DAYTON                  | 1 |
| PALO ALTO HEALTHCARE SYST           | 1 |
| PALO ALTO MED FDN                   | 1 |
| PALO ALTO VET AFFAIRS HLTH CARE CTR | 1 |

|                                       |   |
|---------------------------------------|---|
| PARACELSUS MED UNIV SALZBURG          | 1 |
| PARACELSUS PRIVATE MED UNIV           | 1 |
| PARIS 7 UNIV                          | 1 |
| PARIS LODRON UNIV SALZBURG            | 1 |
| PASTEUR INST IRAN                     | 1 |
| PAUL EHRLICH INST                     | 1 |
| PAULISTA UNIV UNIP                    | 1 |
| PEAK ORTHOPED SPINE                   | 1 |
| PEKING UNIV SCH HOSP STOMATOL         | 1 |
| PELE PEQUENO PRINCIPE INST            | 1 |
| PENINSULA ORTHOPAED RES INST          | 1 |
| PENN HOSP                             | 1 |
| PENN STATE COLL MED                   | 1 |
| PENN STATE UNIV COLL MED              | 1 |
| PEOPLES HOSP DONGPING CTY             | 1 |
| PEOPLES HOSP LEIZHOU                  | 1 |
| PEOPLES LIBERAT ARMY                  | 1 |
| PGIMER                                | 1 |
| PHARMAEXCEED SRL                      | 1 |
| PHILADELPHIA VA MED CTR               | 1 |
| PHILADELPHIA VET AFFAIRS MED CTR      | 1 |
| PITTSBURGH TECHNOL CTR                | 1 |
| PLAST SURG HOSP                       | 1 |
| PMOI                                  | 1 |
| POHANG UNIV SCI TECHNOL               | 1 |
| POLICE ACAD                           | 1 |
| POLICLIN GB ROSSI                     | 1 |
| POLICLIN SAN DONATO                   | 1 |
| POLICLIN SCOTTE                       | 1 |
| POLYTECH MONTREAL                     | 1 |
| POLYTECH UNIV MARCHE                  | 1 |
| POLYTECHN UNIV MARCHE                 | 1 |
| PONTIFICAL CATHOLIC UNIV PARANA PUCPR | 1 |
| POSIT UNIV UP                         | 1 |
| POZNAN UNIV MED SCI                   | 1 |
| PRESTIGE BIORES PTE LTD               | 1 |
| PRESTO                                | 1 |
| PRIME PODIATRY                        | 1 |
| PRINCESS ROYAL UNIV HOSP              | 1 |
| PROXY BIOMED                          | 1 |
| PUAI HOSP                             | 1 |
| PURE SPORTS MED CLIN                  | 1 |
| QSPORTSMEDICINE                       | 1 |
| QUEEN ELIZABETH HOSP BIRMINGHAM       | 1 |
| QUEEN VICTORIA HOSP                   | 1 |

|                                              |   |
|----------------------------------------------|---|
| QUEENS UNIV                                  | 1 |
| QUEENS VET SCH                               | 1 |
| QUT                                          | 1 |
| RABIN MED CTR                                | 1 |
| RACECOURSE VET SURG CLIN                     | 1 |
| RADIOL RES CONSULTAT                         | 1 |
| RAYMOND BEVERLY SACKLER CTR BIOMED BIOL PHYS | 1 |
| RCSI                                         | 1 |
| REABILITA CLIN                               | 1 |
| RED CROSS BLOOD TRANSFUS SERV NORTH EAST     | 1 |
| REG UNIV HOSP MALAGA                         | 1 |
| REGENERAT ORTHOPED SPORTS MED                | 1 |
| REGENERAT ORTHOPED SPORTS MED INST           | 1 |
| REGENERAT SCI LLC                            | 1 |
| REGENEUS PTY LTD                             | 1 |
| REGINA ELENA INST CANC RES                   | 1 |
| REHABIL CLIN YAMAGUCHI                       | 1 |
| RES CTR                                      | 1 |
| RES CTR AUVA                                 | 1 |
| RES CTR TRAUMATOL                            | 1 |
| RES RADIOL RES CONSULTAT                     | 1 |
| RHEIN WESTFAL TH AACHEN                      | 1 |
| RHODE ISL HOSP                               | 1 |
| RI MED FDN                                   | 1 |
| RICHARD L ROUDEBUSH VA MED CTR               | 1 |
| RIKEN                                        | 1 |
| ROHAN GENE CELL TECH                         | 1 |
| ROMED KLINIKUM                               | 1 |
| ROBERT WOOD JOHNSON MED CTR                  | 1 |
| ROTHMAN INST                                 | 1 |
| ROTHMAN INST ORTHOPAED                       | 1 |
| ROYAL CHILDRENS HOSP                         | 1 |
| ROYAL FREE HOSP                              | 1 |
| ROYAL FREE HOSP HAMPSTEAD NHS TRUST          | 1 |
| ROYAL FREE NHS TRUST HOSP                    | 1 |
| ROYAL LIVERPOOL UNIV HOSP                    | 1 |
| ROYAL MARSDEN NHS FDN TRUST                  | 1 |
| ROYAL MELBOURNE HOSP                         | 1 |
| ROYAL NATL ORTHOPAED HOSP NHS TRUST          | 1 |
| ROYAL NATL ORTHOPAED HOSP TRUST              | 1 |
| ROYAL NATL THROAT NOSE EAR HOSP              | 1 |
| ROYAL UNIV HOSP                              | 1 |
| RUISI BIOMAT LTD CO                          | 1 |
| RURAL DEV ADM                                | 1 |
| RUSH PRESBYTERIAN ST LUKES MED CTR           | 1 |

|                                           |   |
|-------------------------------------------|---|
| RUSSIAN ACAD SCI                          | 1 |
| RUTGERS SCH BIOMED HLTH SCI               | 1 |
| RUTGERS SCH MED                           | 1 |
| RWTH AACHEN UNIV CLIN                     | 1 |
| S AFRICAN MED COUNCIL                     | 1 |
| SAGA UNIV                                 | 1 |
| SAHLGRENS UNIV HOSP                       | 1 |
| SAHLGRENSKA UNIV HOSP MOLNDAL             | 1 |
| SALK INST BIOL STUDIES                    | 1 |
| SAMUEL MERRITT UNIV                       | 1 |
| SAMUMED LLC                               | 1 |
| SAN FRANCISCO VA MED CTR                  | 1 |
| SAN FRANCISCO VET AFFAIRS HEALTHCARE SYST | 1 |
| SAN FRANCISCO VET AFFAIRS HLTH CARE SYST  | 1 |
| SAN MARTINO HOSP                          | 1 |
| SAN PABLO CEU UNIV                        | 1 |
| SANFORD CONSORTIUM REGENERAT MED          | 1 |
| SANFORD HLTH                              | 1 |
| SANFORD ORTHOPED SPORTS MED FARGO         | 1 |
| SANFORD ORTHOPED SPORTS MED SIOUX FALLS   | 1 |
| SANFORD RADIOL CLIN                       | 1 |
| SANTA MONICA ORTHOPAED SPORTS MED GRP     | 1 |
| SANTO SPIRITO HOSP                        | 1 |
| SARAH HOSP                                | 1 |
| SARKEYS ENERGY CTR                        | 1 |
| SCH BIOL SCI                              | 1 |
| SCH BIOMED ENGN SCI                       | 1 |
| SCH MED SURG DENT                         | 1 |
| SCHULTHESS CLIN                           | 1 |
| SCRIPPS CLIN                              | 1 |
| SCRIPPS CTR ORGAN CELL TRANSPLANTAT       | 1 |
| SCUOLA SUPER SANT ANNA                    | 1 |
| SE UNIV                                   | 1 |
| SEATTLE SCI FDN                           | 1 |
| SECOND HOSP JILIN UNIV                    | 1 |
| SECOND HOSP TANGSHAN                      | 1 |
| SECOND PEOPLES HOSP LIAO CHENG            | 1 |
| SEIKOH GIKEN CO LTD                       | 1 |
| SELF DEF FORCE HOSP                       | 1 |
| SENTRX ANIM CARE INC                      | 1 |
| SEOUL INST                                | 1 |
| SEOUL JS HOSP                             | 1 |
| SEOUL JUN REHABIL CLIN                    | 1 |
| SERICA TECHNOL INC                        | 1 |
| SFR LYON EST                              | 1 |

|                                                  |   |
|--------------------------------------------------|---|
| SHAANXI UNIV CHINESE MED                         | 1 |
| SHAHID BEHESHTI UNIV MED SCI                     | 1 |
| SHANGHAI CRYOWISE MED TECHNOL CO LTD             | 1 |
| SHANGHAI JIAOTONG UNIV AFFILIATED PEOPLES HOSP 6 | 1 |
| SHANGHAI LIQUN HOSP                              | 1 |
| SHANGHAI NINTH PEOPLES HOSP                      | 1 |
| SHANGHAI NORMAL UNIV                             | 1 |
| SHANGHAI TENTH PEOPLES HOSP                      | 1 |
| SHANGHAI UNIV MED HLTH                           | 1 |
| SHANGHAI UNIV MED HLTH SCI                       | 1 |
| SHANTOU UNIV                                     | 1 |
| SHANXI MED UNIV                                  | 1 |
| SHEBA MED CTR                                    | 1 |
| SHENZHEN CHILDRENS HOSP                          | 1 |
| SHENZHEN GUANGMING NEW DIST PEOPLES HOSP         | 1 |
| SHENZHEN INST GERIATR                            | 1 |
| SHENZHEN LONGGANG INST STOMATOL                  | 1 |
| SHIHEZI UNIV                                     | 1 |
| SHINSHU UNIV                                     | 1 |
| SHIRLEY RYAN ABIL LAB                            | 1 |
| SHOWA UNIV                                       | 1 |
| SHRINERS HOSP CHILDREN ST LOUIS                  | 1 |
| SIGMUND FREUD UNIV                               | 1 |
| SINGAPORE GEN HOSP                               | 1 |
| SIRM                                             | 1 |
| SJTUSM                                           | 1 |
| SKUAST                                           | 1 |
| SKUAST KASHMIR                                   | 1 |
| SMITH NEPHEW GRP                                 | 1 |
| SO CALIF CTR SPORTS MED                          | 1 |
| SO CALIF ORTHOPAED INST                          | 1 |
| SO GEN HOSP                                      | 1 |
| SO ILLINOIS UNIV                                 | 1 |
| SOKENDAI GRAD UNIV ADV STUDIES                   | 1 |
| SONORAN ORTHOPAED TRAUMA SURG                    | 1 |
| SOONCHUNHYANG UNIV                               | 1 |
| SOUTH AUSTRALIAN HLTH MED RES INST               | 1 |
| SOUTH CENT UNIV NATIONALITIES                    | 1 |
| SOUTH MARKET HLTH CTR                            | 1 |
| SOUTHERN CALIF ORTHOPED INST                     | 1 |
| SOUTHERN CALIF PERMANENT MED GRP                 | 1 |
| SOUTHMEAD GEN HOSP                               | 1 |
| SOUTHWEST MED UNIV                               | 1 |
| SPORTHOPAEDICUM BERLIN                           | 1 |
| SPORTPRAXIS PROF DR KARSTEN KNOBLOCH             | 1 |



|                                      |   |
|--------------------------------------|---|
| SPORTS MED UTAH                      | 1 |
| SQUIRE SANDERS US LLP                | 1 |
| ST ANDREA HOSP                       | 1 |
| ST ANDREWS CTR PLAST SURG BURNS      | 1 |
| ST CATHERINE SPECIALTY HOSP          | 1 |
| ST GEORGES UNIV                      | 1 |
| ST GEORGES UNIV LONDON               | 1 |
| ST JAMES UNIV HOSP                   | 1 |
| ST LOUIS CHILDRENS HOSP              | 1 |
| ST LOUIS UNIV HOSP                   | 1 |
| ST MARYS UNIV                        | 1 |
| ST MICHAELS HOSP                     | 1 |
| ST ORSOLA MARCELLO MALPIGHI HOSP     | 1 |
| ST PAULS HOSP                        | 1 |
| ST VINCENT HOSP                      | 1 |
| ST VINCENTS HOSP MELBOURNE           | 1 |
| STANFORD MIPS                        | 1 |
| STANFORD SCH MED                     | 1 |
| STANFORD UNIV HOSP CLIN              | 1 |
| STATE UNIV CAMPINAS UNICAMP          | 1 |
| STEM BIO TEK CORP                    | 1 |
| STEM CELLS SPIN                      | 1 |
| STEM TECH GRP                        | 1 |
| STEPPING HILL HOSP                   | 1 |
| STEVENS INST TECHNOL                 | 1 |
| STRYKER ORTHOPAED                    | 1 |
| SUICHANG PEOPLES HOSP                | 1 |
| SUN ORTHOPED EVANGEL COMMUNITY HOSP  | 1 |
| SUNGHYUNKWAN UNIV                    | 1 |
| SUNWAY UNIV                          | 1 |
| SUSSEX EQUINE HOSP                   | 1 |
| SUZHOU MUNICIPAL HOSP                | 1 |
| SW RES INST                          | 1 |
| SWANSON SCH ENGN                     | 1 |
| SWINBURNE UNIV TECHNOL               | 1 |
| SWISS FED INST TECHNOL EHT ZURICH    | 1 |
| SWISS FED INST TECHNOL LAUSANNE EPFL | 1 |
| SWISS FED INST TECHNOL ZURICH ETHZ   | 1 |
| SWISS PARAPLEG CTR                   | 1 |
| SYNTHASOME INC                       | 1 |
| SYSTEMIX                             | 1 |
| TAIAN CITY CENT HOSP                 | 1 |
| TAIPEI MEDIAL UNIV                   | 1 |
| TAISHAN MED COLL                     | 1 |
| TAIZHOU HOSP                         | 1 |

|                                  |   |
|----------------------------------|---|
| TAMPERE UNIV TECHNOL             | 1 |
| TANGSHAN VOCAT TECH COLL         | 1 |
| TAOS ORTHOPAED INST              | 1 |
| TAOYUAN GEN HOSP                 | 1 |
| TAUBMAN CTR                      | 1 |
| TAYLORS UNIV                     | 1 |
| TCD                              | 1 |
| TEAGASC FOOD RES CTR             | 1 |
| TEAGASC RES CTR                  | 1 |
| TEC PHARMA SA                    | 1 |
| TECH UNIV DARMSTADT              | 1 |
| TECH UNIV DENMARK                | 1 |
| TECHION INST                     | 1 |
| TECHMED CTR                      | 1 |
| TEDA PUHUA INT HOSP              | 1 |
| TEGO SCI INC                     | 1 |
| TEI EPIRUS                       | 1 |
| TEJASVINI HOSP                   | 1 |
| TENGZHOU CENT PEOPLES HOSP       | 1 |
| TENRI UNIV                       | 1 |
| TEVA PHARMACEUT IND LTD          | 1 |
| TEXAS ORTHOBIOL INST             | 1 |
| TEXAS TECH UNIV                  | 1 |
| THE SCIENTIST                    | 1 |
| THOMAS JEFFERSON UNIV HOSP       | 1 |
| TIERKLIN SCHONBUHL               | 1 |
| TIGENIX                          | 1 |
| TIGENIX LTD                      | 1 |
| TISSUE ENGN LAB                  | 1 |
| TISSUE ENGN SIGNALING TES ONLUS  | 1 |
| TISSUE TRANSFORMAT TECHNOL INC   | 1 |
| TITAN SPINE INC                  | 1 |
| TOBB UNIV ECON TECHNOL           | 1 |
| TOHO UNIV                        | 1 |
| TOKYO MED UNIV                   | 1 |
| TOKYO METROPOLITAN BOKUTOH HOSP  | 1 |
| TOKYO UNIV SCI                   | 1 |
| TOR VERGATA UNIV ROME            | 1 |
| TORANOMON GEN HOSP               | 1 |
| TORONTO REHABIL INST UHN         | 1 |
| TRABZON KANUNI TRAINING RES HOSP | 1 |
| TRADIT CHINESE MED HOSP          | 1 |
| TRADIT CHINESE MED SHAOXING HOSP | 1 |
| TRANSLAT CTR REGENERAT MED       | 1 |
| TRANSTISSUE TECHNOL GMBH         | 1 |

|                                                   |   |
|---------------------------------------------------|---|
| TRANSTISSUE TECHNOL GMBH BERLIN                   | 1 |
| TRENTO RES UNIT                                   | 1 |
| TRIINST TRAINING PROGRAM COMPUTAT BIOL MED        | 1 |
| TRINITY SPORTS MED PERFORMANCE CTR                | 1 |
| TRISAKTI UNIV                                     | 1 |
| TRISTATE SPINE CARE INST                          | 1 |
| TSURUMI UNIV                                      | 1 |
| TULANE SCH MED                                    | 1 |
| TYNDALL NATL INST                                 | 1 |
| UAB                                               | 1 |
| UC BIOTECH CANTANHEDE                             | 1 |
| UCL INST ORTHOPAED MUSCULOSKELETAL SCI            | 1 |
| UCL INST ORTHOPAED MUSCULOSKELETAL SCI IOMS       | 1 |
| UCL ROYAL FREE UNIV COLL LONDON                   | 1 |
| UCLA                                              | 1 |
| UCLH                                              | 1 |
| UCONN HLTH CTR                                    | 1 |
| UDELAR                                            | 1 |
| UIT ARCTIC UNIV NORWAY                            | 1 |
| ULM UNIV                                          | 1 |
| UMR CNRS 5246                                     | 1 |
| UNESP JABOTICABAL                                 | 1 |
| UNESP SAO PAULO STATE UNIV                        | 1 |
| UNIARARAS                                         | 1 |
| UNIDAD CIRUGIA ARTROSCOP MIKEL SANCHEZ            | 1 |
| UNIKLIN BALGRIST                                  | 1 |
| UNION MEM HOSP                                    | 1 |
| UNIV AALBORG                                      | 1 |
| UNIV ABERDEEN                                     | 1 |
| UNIV AFFILIATED SOUTHWEST HOSP                    | 1 |
| UNIV APPL SCI                                     | 1 |
| UNIV ARKANSAS MED SCI                             | 1 |
| UNIV AUTONOMA AGUASCALIENTES                      | 1 |
| UNIV AUTONOMA SAN LUIS POTOSI                     | 1 |
| UNIV AVEIRO                                       | 1 |
| UNIV BERGAMO                                      | 1 |
| UNIV BERGEN                                       | 1 |
| UNIV BOLOGNA ALMA MATER STUDIORUM                 | 1 |
| UNIV BONN                                         | 1 |
| UNIV BRASILIA                                     | 1 |
| UNIV BRASILIA UNB                                 | 1 |
| UNIV BRESCIA                                      | 1 |
| UNIV BRISTOL                                      | 1 |
| UNIV CALIF BERKELEY CHONGQING UNIV JOINT PHD STUD | 1 |
| UNIV CAMPINAS UNICAMP                             | 1 |

|                                           |   |
|-------------------------------------------|---|
| UNIV CAMPUS BIOMED ROMA                   | 1 |
| UNIV CAMPUS BIOMEDICO ROMA                | 1 |
| UNIV CANTABRIA IFIMAV                     | 1 |
| UNIV CAPE TOWN                            | 1 |
| UNIV CASTELO BRANCO                       | 1 |
| UNIV CATANIA                              | 1 |
| UNIV CATOLICA                             | 1 |
| UNIV CATOLICA BRASILIA                    | 1 |
| UNIV CATOLICA DOM BOSCO                   | 1 |
| UNIV CATOLICA MURCIA                      | 1 |
| UNIV CATOLICA TEMUCO                      | 1 |
| UNIV CATOLICA VALENCIA SAN VICENTE MARTIR | 1 |
| UNIV CHILDRENS HOSP                       | 1 |
| UNIV CHILE                                | 1 |
| UNIV CHINESE ACAD SCI                     | 1 |
| UNIV CLIN CARL GUSTAV CARUS DRESDEN       | 1 |
| UNIV CLIN DRESDEN                         | 1 |
| UNIV CLIN ORTHOPAED                       | 1 |
| UNIV CLIN TRAUMA SURG SPORTS INJURIES     | 1 |
| UNIV COLL HOSP GALWAY                     | 1 |
| UNIV COLL LONDON UCL                      | 1 |
| UNIV CORDOBA                              | 1 |
| UNIV CRETE                                | 1 |
| UNIV CTR HERMINIO OMETTO FDN FHO          | 1 |
| UNIV CUIABA                               | 1 |
| UNIV DUBLIN TRINITY COLL                  | 1 |
| UNIV ENVIRONM LIFE SCI                    | 1 |
| UNIV ENVIRONM LIFE SCI WROCLAW            | 1 |
| UNIV ESTADUAL MARINGA                     | 1 |
| UNIV ESTADUAL SANTA CRUZ                  | 1 |
| UNIV ESTADUAL SAO PAULO                   | 1 |
| UNIV FED MATO GROSSO DO SUL               | 1 |
| UNIV FED MINAS GERAIS UFMG                | 1 |
| UNIV FED RIO DE JANEIRO                   | 1 |
| UNIV FED RIO GRANDE DO SUL                | 1 |
| UNIV FED RIO GRANDE SUL UFRGS             | 1 |
| UNIV FED SANTA CATARINA                   | 1 |
| UNIV FED SAO CARLOS                       | 1 |
| UNIV FED VALE DO JEQUITINHONHA MUCURI     | 1 |
| UNIV FEDERICO II NAPLES                   | 1 |
| UNIV FREIBURG                             | 1 |
| UNIV FRIBOURG                             | 1 |
| UNIV FUKUI                                | 1 |
| UNIV G DANNUNZIO FDN                      | 1 |
| UNIV GADJAH MADA                          | 1 |

|                                             |   |
|---------------------------------------------|---|
| UNIV GENOA                                  | 1 |
| UNIV GREIFSWALD                             | 1 |
| UNIV GRENOBLE ALPES                         | 1 |
| UNIV HALLE WITTENBERG                       | 1 |
| UNIV HAMBURG                                | 1 |
| UNIV HARTFORD                               | 1 |
| UNIV HENRI POINCARÉ                         | 1 |
| UNIV HLTH NETWORK                           | 1 |
| UNIV HOSP 1                                 | 1 |
| UNIV HOSP AUGSBURG                          | 1 |
| UNIV HOSP BERN                              | 1 |
| UNIV HOSP CLEVELAND                         | 1 |
| UNIV HOSP CTR SESTRE MILOSRDNICE            | 1 |
| UNIV HOSP JENA                              | 1 |
| UNIV HOSP LAUSANNE CHUV                     | 1 |
| UNIV HOSP RWTH AACHEN                       | 1 |
| UNIV HOSP SAO PAULO                         | 1 |
| UNIV HOSP SCHLESWIG HOLSTEIN                | 1 |
| UNIV HOSP SVETI DUH                         | 1 |
| UNIV HOSP ULM                               | 1 |
| UNIV HOSP VIRGEN VICTORIA                   | 1 |
| UNIV HOSP WURZBURG                          | 1 |
| UNIV HULL                                   | 1 |
| UNIV IDAHO                                  | 1 |
| UNIV INNSBRUCK HOSP                         | 1 |
| UNIV INSUBRIA                               | 1 |
| UNIV INT CATALUNYA                          | 1 |
| UNIV JENA                                   | 1 |
| UNIV KLINIKUM REGENSBURG                    | 1 |
| UNIV LA FRONTERA                            | 1 |
| UNIV LA LAGUNA                              | 1 |
| UNIV LA SAPIENZA BIOMED SCI PK SAN RAFFAELE | 1 |
| UNIV LAGOS                                  | 1 |
| UNIV LAHORE                                 | 1 |
| UNIV LAUSANNE                               | 1 |
| UNIV LAVAL                                  | 1 |
| UNIV LEICESTER                              | 1 |
| UNIV LEON                                   | 1 |
| UNIV LIEGE                                  | 1 |
| UNIV LIFE SCI LUBLIN                        | 1 |
| UNIV LILLE NORD FRANCE                      | 1 |
| UNIV LITTORAL COTE DOPALE                   | 1 |
| UNIV LIVERPOO                               | 1 |
| UNIV LJUBLJANA                              | 1 |
| UNIV LOUISVILLE                             | 1 |

|                                    |   |
|------------------------------------|---|
| UNIV LUND                          | 1 |
| UNIV LUND HOSP                     | 1 |
| UNIV MANSOURA                      | 1 |
| UNIV MASSACHUSETTS                 | 1 |
| UNIV MED BERLIN                    | 1 |
| UNIV MED CTR HAMBURG EPPENDORF     | 1 |
| UNIV MED CTR ROTTERDAM             | 1 |
| UNIV MED PHARM CRAIOVA             | 1 |
| UNIV MESSINA                       | 1 |
| UNIV MICHIGAN SURG                 | 1 |
| UNIV MISSISSIPPI                   | 1 |
| UNIV MIYAZAKI                      | 1 |
| UNIV MONTPELLIER 2                 | 1 |
| UNIV MONTREAL HOSP                 | 1 |
| UNIV MYSORE                        | 1 |
| UNIV NANCY 1                       | 1 |
| UNIV NAT RESOURCES LIFE SCI        | 1 |
| UNIV NEW MEXICO                    | 1 |
| UNIV NICE                          | 1 |
| UNIV NORTH CAROLINA CHARLOTTE      | 1 |
| UNIV NORTH TEXAS                   | 1 |
| UNIV NOVA LISBOA                   | 1 |
| UNIV NOVE JULHO UNINOVE            | 1 |
| UNIV OCCUPAT ENVIRONM HLTH         | 1 |
| UNIV OSIJEK                        | 1 |
| UNIV OSLO                          | 1 |
| UNIV OTAGO                         | 1 |
| UNIV PARIS 05                      | 1 |
| UNIV PARIS DIDEROT                 | 1 |
| UNIV PARIS EST CRETEIL             | 1 |
| UNIV PARIS SACLAY                  | 1 |
| UNIV PARIS SUD                     | 1 |
| UNIV PAUIISTA                      | 1 |
| UNIV PICARDIE JULES VERNE          | 1 |
| UNIV PIEMONTE ORIENTALE            | 1 |
| UNIV PITTSBURGH MED CTR UPMC HAMOT | 1 |
| UNIV POLITECN VALENCIA             | 1 |
| UNIV PUERTO RICO                   | 1 |
| UNIV REIMS                         | 1 |
| UNIV RIJEKA                        | 1 |
| UNIV ROME                          | 1 |
| UNIV ROSTOCK                       | 1 |
| UNIV S DAKOTA                      | 1 |
| UNIV S MANCHESTER HOSP             | 1 |
| UNIV SALENTO                       | 1 |

|                                         |   |
|-----------------------------------------|---|
| UNIV SALZBURG                           | 1 |
| UNIV SANTO TOMAS                        | 1 |
| UNIV SCI PHILADELPHIA                   | 1 |
| UNIV SEBELAS MARET                      | 1 |
| UNIV SIEGEN                             | 1 |
| UNIV SIENA                              | 1 |
| UNIV SOUTH AUSTRALIA                    | 1 |
| UNIV SOUTH CAROLINA                     | 1 |
| UNIV SPITAL ZURICH                      | 1 |
| UNIV ST ANDREWS                         | 1 |
| UNIV STATE SAO PAULO                    | 1 |
| UNIV STRATHCLYDE                        | 1 |
| UNIV SUSSEX                             | 1 |
| UNIV TASMANIA                           | 1 |
| UNIV TECHNOL                            | 1 |
| UNIV TEKNOL MALAYSIA                    | 1 |
| UNIV TEXAS HLTH SCI CTR HOUSTON UT HLTH | 1 |
| UNIV TEXAS MD ANDERSON CANC CTR         | 1 |
| UNIV TEXAS SOUTHWESTERN MED CTR         | 1 |
| UNIV THESSALY                           | 1 |
| UNIV TOKUSHIMA                          | 1 |
| UNIV TOKYO HOSP                         | 1 |
| UNIV TRAS OS MONTES ALTO DOURO          | 1 |
| UNIV TSUKUBA                            | 1 |
| UNIV TUBINGEN HOSP                      | 1 |
| UNIV URBINO CARLO BO                    | 1 |
| UNIV VALLADOLID                         | 1 |
| UNIV VEIGA ALMEIDA                      | 1 |
| UNIV VERONA ITALY                       | 1 |
| UNIV VET ANIM SCI                       | 1 |
| UNIV VET MED                            | 1 |
| UNIV VET PHARMACEUT SCI BRNO            | 1 |
| UNIV WARSAW                             | 1 |
| UNIV WARWICK                            | 1 |
| UNIV WEST INDIES                        | 1 |
| UNIV WITTEN HERDECKE                    | 1 |
| UNIV WOLLONGONG                         | 1 |
| UNIV ZAGREB                             | 1 |
| UNIV ZURICH BALGRIST                    | 1 |
| UPMC CTR SPORTS MED                     | 1 |
| US ARMY INST SURG RES                   | 1 |
| US DEPT COMMERCE                        | 1 |
| USC KECK SCH MED                        | 1 |
| USN                                     | 1 |
| USP HOSP                                | 1 |

|                                                  |   |
|--------------------------------------------------|---|
| VA BOSTON HEALTHCARE SYST                        | 1 |
| VA NEBRASKA WESTERN IOWA HLTH CARE S             | 1 |
| VALLEY ANESTHESIOLOG PAIN CONSULTANTS ENVIS PHYS | 1 |
| VANCOUVER COASTAL HLTH RES INST                  | 1 |
| VANDERBILT UNIV                                  | 1 |
| VARINOR MAT SA                                   | 1 |
| VET ACTIV LTDA                                   | 1 |
| VET ADM MED CTR                                  | 1 |
| VET ADM PALO ALTO                                | 1 |
| VET ADM PALO ALTO HEALTHCARE SYST                | 1 |
| VET AFFAIRS HOSP                                 | 1 |
| VET AFFAIRS PALO HLTH CARE SYST                  | 1 |
| VET AFFAIRS SAN DIEGO HEALTHCARE SYST            | 1 |
| VET CLIN                                         | 1 |
| VET ORTHOPED SPORTS MED                          | 1 |
| VET ORTHOPED SPORTS MED GRP                      | 1 |
| VET ORTHOPED SURG SERV                           | 1 |
| VET STUDIO                                       | 1 |
| VETCELL BIOSCI                                   | 1 |
| VETMEDUNI VIENNA                                 | 1 |
| VICTOR BABES UNIV MED PHARM TIMISOARA            | 1 |
| VICTORIAN NODE AUSTRALIAN NATL FABRICAT          | 1 |
| VICTORIAN NODE AUSTRALIAN NATL FABRICAT FACIL    | 1 |
| VIENNA VET SCH                                   | 1 |
| VIRGINIA MARYLAND COLL VET MED                   | 1 |
| VIRGINIA MARYLAND REG COLL VETERI MED            | 1 |
| VIRTUAL UNIV PAKISTAN                            | 1 |
| VIT                                              | 1 |
| VITEC VIDEOCOM LTD                               | 1 |
| VORNIA BIOMAT                                    | 1 |
| VRIJE UNIV AMSTERDAM                             | 1 |
| VRIJE UNIV BRUSSEL                               | 1 |
| WAKE FOREST UNIV HLTH SCI                        | 1 |
| WALTER REED NATL MIL MED CTR                     | 1 |
| WALTHAM CTR PET NUTR                             | 1 |
| WARSAW MED UNIV                                  | 1 |
| WASEDA UNIV                                      | 1 |
| WASHINGTON UNIV ST LOUIS                         | 1 |
| WEILL CORNELL MED SCH                            | 1 |
| WEIZMANN INST SCI                                | 1 |
| WELLCOME TRUST CTR CELL MATRIX RES               | 1 |
| WENZHOU CENT HOSP                                | 1 |
| WEST VIRGINIA UNIV                               | 1 |
| WESTERN NEW ENGLAND UNIV                         | 1 |
| WHISTON GEN HOSP                                 | 1 |



|                                      |   |
|--------------------------------------|---|
| WHISTON HOSP                         | 1 |
| WISTAR INST ANAT BIOL                | 1 |
| WROCLAW RES CTR ETT                  | 1 |
| WROCLAW UNIV ENVIMNMCNTAL LIFE SCI   | 1 |
| WUHAN GEN HOSP GUANGZHOU COMMAND     | 1 |
| WUHAN GEN HOSP GUANGZHOU MIL COMMAND | 1 |
| WUHAN TEXT UNIV                      | 1 |
| WYETH RES                            | 1 |
| XIAN MED UNIV                        | 1 |
| XIANGFAN CENT HOSP                   | 1 |
| XINXIANG MED COLL                    | 1 |
| XUZHOU MATERN CHILD HLTH CARE HOSP   | 1 |
| YANCHENG INST TECHNOL                | 1 |
| YESHIVA UNIV                         | 1 |
| YILDIZ TECH UNIV                     | 1 |
| YOKOHAMA CITY UNIV                   | 1 |
| YOKOHAMA UNIV PHARM                  | 1 |
| YOKUSHUKAI DENT CLIN                 | 1 |
| YONSEI SARANG HOSP                   | 1 |
| YUE BEI PEOPLES HOSP                 | 1 |
| YUKIOKA HOSP                         | 1 |
| ZAND INST HIGHER EDUC                | 1 |
| ZHEJIANG PROV KEY LAB ORTHOPAED      | 1 |
| ZHEJIANG PROV PEOPLES HOSP           | 1 |
| ZHEJIANG SCI TECH UNIV               | 1 |
| ZHEJIANG XINGYUE BIOTECHNOL CO LTD   | 1 |
| ZIMMER INC                           | 1 |
| ZONGULDAK KARAELEMAS UNIV            | 1 |
| ZURICH UNIV APPL SCI                 | 1 |
| ZYMOGENET INC                        | 1 |

---
