# Supplementary material for: Global Research Trends in Tendon Stem Cells from 1991 to 2020: A Bibliometric and Visualized Study
Source: Hindawi journal article supplement (doi:10.1155/2022/7937765), 2022-06-18
Supplement: f4 [file 7937765.f4.pdf]

Supplementary Table 4. The five clusters of keywords on tendon stem cells research from 1991 to 2020

| Cluster 1:                   | Cluster 2:              | Cluster 3:            | Cluster 4:                | Cluster 5:                          |              |
|------------------------------|-------------------------|-----------------------|---------------------------|-------------------------------------|--------------|
| Animal study (54)            | Tissue engineering (39) | Clinical study (30)   | Mechanism research (50)   | Stem cells research (40)            |              |
| acl reconstruction           | adhesion                | achilles tendinopathy | activation                | adipose tissue                      |              |
| allograft                    | alignment               | achilles tendon       | age-related-changes       | adipose-tissue                      |              |
| animal model                 | biocompatibility        | achilles-tendon       | apoptosis                 | articular-cartilage                 |              |
| animal-models                | biomaterials            | achilles-tendon       | connective-tissue         | autologous chondrocyte implantation |              |
| anterior cruciate ligament   | bioreactor              | basic science         | cytokines                 | bone marrow                         |              |
| arthroscopic repair          | bone                    | biology               | differentiation           | bone regeneration                   |              |
| augmentation                 | cells                   | delivery              | endothelial-cells         | bone-marrow                         |              |
| autograft                    | collagen                | double-blind          | expression                | cartilage                           |              |
| biomechanical properties     | collagen constructs     | sponge                | endothelial growth-factor | extracellular matrix                | cell therapy |
| biomechanics                 | constructs              | flexor tendon         | extracellular-matrix      | chondrocytes                        |              |
| bone morphogenetic protein-2 | cross-linking           | gene therapy          | fibroblasts               | chondrogenesis                      |              |
| cruciate reconstruction      | ligament degradation    | gene-transfer         | gene                      | chondrogenic differentiation        |              |
| defect                       | electrospinning         | growth factor         | gene expression           | culture                             |              |
| degeneration                 | engineered tendon       | growth factors        | gene-expression           | defects                             |              |
| enhancement                  | fabrication             | growth-factor-i       | growth                    | digital flexor tendon               |              |
| enthesis                     | fibers                  | growth-factors        | identification            | equine                              |              |

|                            |                           |                             |                            |                           |
|----------------------------|---------------------------|-----------------------------|----------------------------|---------------------------|
| fatty infiltration         | fibroblast-growth-factor  | healing                     | inflammation               | horse                     |
| follow-up                  | flexor tendons            | heterotopic ossification    | injury                     | horses                    |
| graft                      | hydrogel                  | injection                   | matrix                     | human adipose-tissue      |
| grafts                     | in-vitro                  | management                  | mechanisms                 | human bone-marrow         |
| growth-factor              | ligament                  | pathogenesis                | messenger-rna              | implantation              |
| growth-factor-beta         | mechanical stimulation    | platelet-rich plasma        | mice                       | injuries                  |
| in-vivo                    | mechanical-properties     | prp                         | migration                  | intraarticular injection  |
| insertion                  | mechanobiology            | rabbit achilles-tendon      | muscle                     | marrow stromal cells      |
| integrity                  | mechanotransduction       | randomized controlled-trial | osteoblasts                | mesenchymal stem cell     |
| knee                       | nanofiber scaffolds       | repair                      | osteogenic differentiation | mesenchymal stem cells    |
| marrow                     | nanofibers                | tendinopathy                | phenotype                  | mesenchymal stromal cells |
| medial collateral ligament | nanofibrous scaffolds     | tendinosis                  | progenitors                | osteoarthritis            |
| mesenchymal stem-cells     | scaffold                  | tendon healing              | proliferation              | osteogenesis              |
| model                      | scaffolds                 | tendon injury               | promotes                   | progenitor cells          |
| morphogenetic protein-2    | silk scaffold             |                             | protein                    | regenerative medicine     |
| outcomes                   | tendon                    |                             | rat                        | stem cell                 |
| patellar tendon            | tendon tissue engineering |                             | responses                  | stem cells                |
| rabbit                     | tenogenic differentiation |                             | scleraxis                  | stromal cells             |
| rabbit model               | tissue                    |                             | scleraxis expression       | tendinitis                |
| rat model                  | tissue engineering        |                             | self-renewal               | tendon injuries           |
| reconstruction             | tissue regeneration       |                             | stem-cells                 | tendon repair             |

|                            |       |                              |                      |
|----------------------------|-------|------------------------------|----------------------|
| regeneration               | vitro | stem/progenitor cells        | therapy              |
| rotator cuff               | vivo  | stimulation                  | transplantation      |
| rotator cuff repair        |       | tenascin-c                   | umbilical-cord blood |
| rotator cuff tear          |       | tendon differentiation       |                      |
| rotator cuff tears         |       | tendon regeneration          |                      |
| rupture                    |       | tendon stem cells            |                      |
| satellite cells            |       | tendon stem/progenitor cells |                      |
| shoulder                   |       | tendon-derived stem cells    |                      |
| skeletal-muscle            |       | tendons                      |                      |
| small-intestinal submucosa |       | tenocyte                     |                      |
| supraspinatus              |       | tenocytes                    |                      |
| supraspinatus tendon       |       | tenomodulin                  |                      |
| surgical repair            |       | tgf-beta                     |                      |
| tears                      |       |                              |                      |
| tendon graft               |       |                              |                      |
| tendon-bone healing        |       |                              |                      |
| tunnel                     |       |                              |                      |
